# Supplementary material
Source: publisher figshare collection journal article supplement (https://gsapubs.figshare.com/articles/dataset/_/12541781)
Supplement: Supplementary file 1 [file 1]

## Sheet: Sheet1
Supplementary Data for Craddock Affinati et al.
Table DR3. Output files produced by the modeling of P-T paths using the method of Moynihan and Pattison (2013)
SCFM314-1MW G1
No.1	Distance (μm)2	T(°C)3	P(bars)4	Mod Alm5	Mod Prp6	Mod Sps7	Mod Grs8	Obs Alm9	Obs Prp10	Obs Sps11	Obs Grs12
Core 1	860	564.82	4684.11	0.7228	0.0899	0.0826	0.1047	0.737	0.081	0.081	0.101
2	840	564.95	4664.85	0.7234	0.0901	0.0826	0.1038	0.739	0.079	0.083	0.099
3	820	564.19	4768.85	0.7197	0.0887	0.0826	0.109	0.731	0.08	0.084	0.105		Annotations
4	800	564.55	4722.04	0.7214	0.0893	0.0826	0.1066	0.737	0.079	0.083	0.102	1	Point along the garnet traverse starting in the core and ending on the rim
5	780	564.65	4707.78	1000	0	0	0	0.7385	0.0785	0.0825	0.101	2	The actual distance along the traverse that the point represents
6	760	564.75	4693.47	0.7224	0.0897	0.0826	0.1052	0.74	0.078	0.082	0.1	3	The temperature calculated for the point by the Matlab program
7	740	564.95	4665.71	0.7234	0.0901	0.0826	0.1038	0.741	0.079	0.081	0.099	4	The pressure calculated for the point by the Matlab program
8	720	565.23	4624.47	0.7248	0.0907	0.0826	0.1018	0.738	0.081	0.083	0.098	5	The modeled almandine value (XFe) calculated by the Matlab program
9	700	564.36	4746.86	0.7205	0.089	0.0826	0.1079	0.74	0.075	0.083	0.101	6	The modeled pyrope value (XMg) calculated by the Matlab program
10	680	564.77	4692.29	0.7225	0.0898	0.0826	0.1051	0.738	0.08	0.081	0.101	7	The modeled spessartine value (XMn) calculated by the Matlab program
11	660	564.4	4744.12	0.7207	0.089	0.0826	0.1077	0.737	0.078	0.082	0.103	8	The modeled grossular value (XCa) calculated by the Matlab program
12	640	562.92	4956.03	0.7135	0.0861	0.0814	0.119	0.7305	0.0765	0.0795	0.1135	9	The measured almandine value (XFe) from microprobe analysis
13	620	561.71	5148.99	0.7077	0.0836	0.0786	0.13	0.724	0.075	0.077	0.124	10	The meaured pyrope value (XMg) from microprobe analysis
14	600	563.22	5049.47	0.7141	0.0859	0.0771	0.1229	0.7305	0.077	0.0755	0.1175	11	The measured spessartine value (XMn) from microprobe analysis
15	580	564.7	4941.45	0.7205	0.0882	0.0755	0.1158	0.737	0.079	0.074	0.111	12	The measured grossular value (XCa) from microprobe analysis
16	560	564.94	4916.99	0.7216	0.0886	0.0754	0.1144	0.736	0.08	0.074	0.11
17	540	565.41	4960.37	0.7232	0.0889	0.0723	0.1156	0.738	0.08	0.071	0.111
18	520	565.9	4935.26	0.7252	0.0896	0.0714	0.1138	0.741	0.08	0.07	0.109
19	500	566.26	4943.86	0.7265	0.09	0.0698	0.1137	0.7425	0.0805	0.0685	0.109
20	480	566.62	4953.51	0.7278	0.0903	0.0683	0.1136	0.744	0.081	0.067	0.109
21	460	567.38	4963.49	0.7306	0.0911	0.0653	0.1129	0.7475	0.081	0.064	0.108
22	440	568.15	4974.05	0.7334	0.092	0.0623	0.1123	0.751	0.081	0.061	0.107
23	420	568.36	5053.51	0.7336	0.0918	0.0592	0.1155	0.752	0.081	0.058	0.11
24	400	569.31	5082.86	0.7369	0.0927	0.055	0.1154	0.755	0.082	0.054	0.11
25	380	570.55	5079.51	0.7414	0.0943	0.0509	0.1134	0.758	0.083	0.05	0.108
26	360	570.21	5216.76	0.7391	0.0931	0.0479	0.12	0.757	0.082	0.047	0.114
27	340	571.87	5181.52	0.7452	0.0953	0.0436	0.1159	0.761	0.085	0.043	0.111
28	320	572.41	5293.11	0.746	0.0954	0.0386	0.12	0.764	0.084	0.038	0.114
29	300	572.45	5392.66	0.7451	0.0949	0.0354	0.1245	0.761	0.085	0.035	0.119
30	280	574.37	5305.75	0.7522	0.0979	0.0324	0.1175	0.769	0.087	0.032	0.112
31	260	575.36	5392.26	0.7542	0.0988	0.0273	0.1198	0.769	0.089	0.027	0.115
32	240	575.79	5417.14	0.7551	0.0993	0.0255	0.1202	0.779	0.09	0.025	0.106
33	220	576.7	5492.93	0.7565	0.1002	0.0212	0.1221	0.772	0.091	0.021	0.117
34	200	577.32	5539.3	0.7572	0.1009	0.0187	0.1231	0.7755	0.092	0.0185	0.1145
35	180	577.92	5587.27	0.7579	0.1016	0.0162	0.1243	0.779	0.093	0.016	0.112
36	160	578.78	5652.86	0.7585	0.1026	0.0131	0.1258	0.776	0.093	0.013	0.118
37	140	579.38	5700.82	0.7586	0.1034	0.0111	0.1269	0.778	0.096	0.011	0.115
38	120	579.74	5782.72	0.7572	0.1037	0.009	0.13	0.77	0.096	0.009	0.126
39	100	580.5	5781.59	0.7585	0.105	0.008	0.1285	0.774	0.1	0.008	0.118
40	80	582.06	5887.98	0.7573	0.1074	0.0049	0.1304	0.774	0.102	0.005	0.119
41	60	582.66	5929.52	0.7565	0.1084	0.004	0.1311	0.768	0.105	0.004	0.123
42	40	582.67	5929.33	1000	0	0	0	0.76	0.108	0.005	0.128
43	20	582.64	5931.42	0.7564	0.1084	0.004	0.1312	0.756	0.111	0.009	0.124
44	0	582.35	5954.12	0.7553	0.1078	0.004	0.1329	0.747	0.107	0.014	0.132
SCFM314-1MW G3
No.1	Distance (μm)2	T(°C)3	P(bars)4	Mod Alm5	Mod Prp6	Mod Sps7	Mod Grs8	Obs Alm9	Obs Prp10	Obs Sps11	Obs Grs12
1	920	565.17	5026.25	0.7219	0.0882	0.0711	0.1189	0.734	0.081	0.07	0.115
2	900	565.84	5020.01	0.7245	0.089	0.0689	0.1176	0.736	0.082	0.068	0.114
3	880	566.26	4972.68	0.7264	0.0898	0.0689	0.1149	0.738	0.082	0.069	0.111
4	860	566.27	4973.46	0.7264	0.0898	0.0689	0.1149	0.736	0.081	0.069	0.113
5	840	566.09	5053.97	0.7252	0.0891	0.0669	0.1188	0.737	0.082	0.066	0.115
6	820	566.6	4998.29	0.7275	0.09	0.0669	0.1155	0.738	0.083	0.067	0.112
7	800	565.94	5077.04	0.7245	0.0888	0.0667	0.12	0.735	0.083	0.066	0.117
8	780	567.37	4939.37	0.7309	0.0913	0.066	0.1119	0.744	0.083	0.065	0.108
9	760	567.12	4973.27	0.7297	0.0908	0.0659	0.1137	0.741	0.083	0.065	0.11
10	740	567.21	4962.69	0.7301	0.0909	0.0659	0.1131	0.7415	0.0835	0.0655	0.1095
11	720	567.22	4961.86	0.7302	0.091	0.0659	0.113	0.742	0.084	0.066	0.109
12	700	567.48	5000.22	0.7308	0.091	0.0638	0.1143	0.743	0.084	0.063	0.111
13	680	567.51	5182.51	0.7297	0.09	0.0578	0.1225	0.743	0.082	0.057	0.118
14	660	568.59	5097.29	0.7343	0.0918	0.057	0.117	0.75	0.082	0.056	0.112
15	640	568.11	5178.5	0.7319	0.0907	0.0559	0.1214	0.749	0.081	0.055	0.116
16	620	567.51	5295.64	0.7289	0.0893	0.0539	0.1279	0.745	0.08	0.053	0.122
17	600	569.03	5274.12	0.7346	0.0913	0.0497	0.1244	0.749	0.082	0.049	0.119
18	580	569.19	5336.66	0.7346	0.0911	0.0471	0.1271	0.7485	0.0825	0.0465	0.122
19	560	569.33	5399.14	0.7346	0.0909	0.0445	0.1299	0.748	0.083	0.044	0.125
20	540	571.43	5224.86	0.7434	0.0945	0.0437	0.1184	0.76	0.084	0.043	0.113
21	520	572.09	5186.16	0.7461	0.0956	0.0427	0.1157	0.764	0.084	0.042	0.11
22	500	571.08	5420.77	0.7404	0.093	0.0385	0.1281	0.757	0.083	0.038	0.122
23	480	572.17	5350.14	0.7448	0.0948	0.0375	0.1229	0.762	0.084	0.037	0.117
24	460	572.57	5364.23	0.7459	0.0952	0.0359	0.1229	0.761	0.086	0.0355	0.118
25	440	572.97	5378.86	0.7471	0.0956	0.0343	0.123	0.76	0.088	0.034	0.119
26	420	574.17	5326.05	0.7515	0.0975	0.0324	0.1186	0.766	0.088	0.032	0.114
27	400	574.86	5349.11	0.7534	0.0983	0.0297	0.1186	0.7655	0.0905	0.0295	0.1145
28	380	575.42	5386.93	0.7546	0.0989	0.0272	0.1193	0.765	0.093	0.027	0.115
29	360	575.61	5402.4	0.7549	0.0991	0.0263	0.1197	0.767	0.096	0.026	0.111
30	340	576.22	5448.1	0.7555	0.0998	0.024	0.1207	0.763	0.0985	0.024	0.1145
31	320	576.94	5499.13	0.7556	0.1008	0.0221	0.1216	0.759	0.101	0.022	0.118
32	300	575.54	5659.34	0.7508	0.0978	0.0195	0.1319	0.753	0.102	0.02	0.125
33	280	577.54	5554.64	1000	0	0	0	0.758	0.108	0.018	0.116
34	260	577.99	5590.66	0.7579	0.1017	0.0162	0.1242	0.756	0.108	0.016	0.119
35	240	578.09	5596.5	0.7578	0.1019	0.0161	0.1242	0.7537	0.1087	0.0157	0.121
36	220	578.18	5605.8	0.7581	0.1019	0.0154	0.1245	0.7513	0.1093	0.0153	0.123
37	200	578.26	5614.04	0.7584	0.102	0.0148	0.1248	0.749	0.11	0.015	0.125
38	180	578.26	5614.64	0.7584	0.102	0.0148	0.1249	0.749	0.1105	0.0155	0.1245
39	160	578.28	5614.78	0.7584	0.102	0.0148	0.1248	0.749	0.111	0.016	0.124
40	140	584.18	5964.64	0.7482	0.1127	0.0125	0.1266	0.7515	0.113	0.0125	0.123
41	120	585.35	6053.8	0.7481	0.1144	0.009	0.1285	0.754	0.115	0.009	0.122
42	100	585.53	6071.05	0.7484	0.1146	0.0079	0.1291	0.756	0.118	0.008	0.118
43	80	585.42	6077.04	0.7498	0.114	0.0059	0.1302	0.754	0.118	0.006	0.122
44	60	585.39	6076.29	0.75	0.1139	0.0057	0.1304	0.753	0.118	0.0065	0.122
45	40	585.38	6077.08	0.7501	0.1139	0.0055	0.1305	0.752	0.118	0.007	0.122
46	20	585.55	6092.95	0.7503	0.1141	0.0046	0.1311	0.7615	0.1145	0.016	0.108
47	0	587.66	6218.8	1000	0	0	0	0.771	0.111	0.025	0.094
SCFM315-12C G1
No.1	Distance (μm)2	T(°C)3	P(bars)4	Mod Alm5	Mod Prp6	Mod Sps7	Mod Grs8	Obs Alm9	Obs Prp10	Obs Sps11	Obs Grs12
1	1062	551.46	4307.32	0.7681	0.068	0.0846	0.0793	0.765	0.07	0.085	0.08
2	1080	551.56	4303.76	0.7685	0.0682	0.0843	0.079	0.765	0.071	0.085	0.08
3	1098	551.88	4293.76	0.7698	0.0685	0.0835	0.0781	0.766	0.071	0.084	0.079
4	1116	551.97	4291.44	0.7702	0.0686	0.0833	0.0779	0.766	0.072	0.084	0.079
5	1134	551.9	4298.61	0.7699	0.0685	0.0833	0.0783	0.766	0.071	0.085	0.079
6	1152	551.91	4299.35	0.7699	0.0685	0.0833	0.0783	0.765	0.07	0.085	0.079
7	1170	551.72	4318.95	0.7691	0.0682	0.0833	0.0793	0.765	0.07	0.085	0.08
8	1188	551.55	4335.55	0.7684	0.068	0.0834	0.0802	0.764	0.07	0.084	0.081
9	1206	551.39	4351.79	0.7678	0.0677	0.0834	0.0811	0.764	0.07	0.084	0.082
10	1224	551.25	4376.22	0.7672	0.0674	0.0831	0.0823	0.76	0.072	0.084	0.084
11	1242	551.71	4381.24	0.769	0.0678	0.0814	0.0818	0.764	0.071	0.082	0.083
12	1260	551.69	4383.59	0.7689	0.0678	0.0814	0.0819	0.762	0.071	0.084	0.083
13	1278	551.7	4387.77	0.7689	0.0678	0.0812	0.0821	0.761	0.072	0.083	0.085
14	1296	551.71	4388.59	0.769	0.0678	0.0811	0.0821	0.761	0.072	0.083	0.085
15	1314	551.35	4425.87	0.7675	0.0672	0.0811	0.0842	0.76	0.072	0.082	0.086
16	1332	551.36	4426.62	0.7675	0.0672	0.081	0.0842	0.76	0.072	0.082	0.086
17	1350	551.14	4448.5	0.7666	0.0669	0.0811	0.0855	0.76	0.071	0.082	0.087
18	1368	550.94	4466.09	0.7658	0.0666	0.0811	0.0865	0.76	0.07	0.082	0.088
19	1386	550.93	4489.71	0.7657	0.0664	0.0803	0.0875	0.76	0.07	0.081	0.089
20	1404	550.89	4499.3	0.7655	0.0663	0.0801	0.088	0.759	0.071	0.081	0.09
21	1422	550.92	4523.12	0.7657	0.0662	0.0791	0.089	0.759	0.071	0.08	0.091
22	1440	550.76	4537.6	0.765	0.066	0.0791	0.0899	0.758	0.071	0.08	0.092
23	1458	550.97	4546.54	0.7658	0.0661	0.0781	0.0899	0.758	0.071	0.079	0.092
24	1476	551.08	4565.36	0.7663	0.0662	0.077	0.0905	0.757	0.072	0.078	0.093
25	1494	550.96	4578.61	0.7658	0.066	0.0769	0.0913	0.757	0.072	0.078	0.094
26	1512	550.99	4601.71	0.7659	0.0659	0.076	0.0923	0.756	0.072	0.077	0.095
27	1530	551.58	4626.6	0.7682	0.0663	0.0731	0.0924	0.76	0.072	0.074	0.095
28	1548	552.06	4658.91	0.7701	0.0666	0.0703	0.093	0.763	0.071	0.071	0.095
29	1566	552.5	4698.26	0.7718	0.0668	0.0674	0.094	0.765	0.071	0.068	0.096
30	1584	553.02	4734.71	0.7738	0.0671	0.0644	0.0947	0.766	0.072	0.065	0.097
31	1602	553.44	4774.35	0.7755	0.0673	0.0615	0.0958	0.768	0.072	0.062	0.098
32	1620	554.04	4802.87	0.7777	0.0677	0.0585	0.096	0.77	0.072	0.059	0.098
33	1638	554.57	4838.45	0.7798	0.0681	0.0555	0.0967	0.771	0.073	0.056	0.099
34	1656	555.01	4878.68	0.7814	0.0683	0.0526	0.0977	0.773	0.073	0.053	0.1
35	1674	554.52	4987.14	0.7794	0.0672	0.0496	0.1039	0.77	0.073	0.05	0.107
36	1692	555.17	4990.54	0.7818	0.0678	0.0476	0.1028	0.772	0.074	0.048	0.106
37	1710	556.14	4994.13	0.7855	0.0688	0.0446	0.1011	0.775	0.075	0.045	0.104
38	1728	556.82	4996.38	0.788	0.0695	0.0426	0.0999	0.777	0.076	0.043	0.103
39	1746	558.05	5009.96	0.7924	0.0708	0.0387	0.0982	0.782	0.077	0.039	0.101
40	1764	558.06	5085.28	0.7922	0.0704	0.0357	0.1017	0.782	0.077	0.036	0.105
41	1782	558.21	5149.32	0.7924	0.0702	0.0328	0.1046	0.782	0.077	0.033	0.108
42	1800	558.67	5144.95	0.7941	0.0708	0.0317	0.1034	0.784	0.078	0.032	0.107
43	1818	559.28	5155.05	0.7961	0.0714	0.0298	0.1027	0.786	0.078	0.03	0.106
44	1836	559.81	5173.31	0.7978	0.0719	0.0278	0.1026	0.788	0.079	0.028	0.106
45	1854	561.23	5158.55	0.8025	0.0736	0.0248	0.0991	0.793	0.08	0.025	0.102
46	1872	561.21	5216.18	0.802	0.0733	0.0229	0.1018	0.792	0.08	0.023	0.105
47	1890	561.44	5257.15	0.8024	0.0734	0.0209	0.1034	0.791	0.081	0.021	0.107
48	1908	561.46	5313.01	0.8018	0.0732	0.0189	0.1061	0.79	0.081	0.019	0.11
49	1926	561.66	5358.95	0.8019	0.0733	0.0169	0.108	0.789	0.081	0.017	0.112
50	1944	561.66	5359.79	0.8019	0.0733	0.0168	0.108	0.796	0.078	0.017	0.109
51	1962	561.88	5404.83	0.8019	0.0734	0.0149	0.1099	0.79	0.081	0.015	0.114
52	1980	562.01	5427.79	0.8019	0.0734	0.0139	0.1108	0.793	0.079	0.014	0.114
53	1998	562.14	5451.02	0.8018	0.0735	0.0129	0.1117	0.792	0.081	0.013	0.115
54	2016	562.65	5456.04	0.8031	0.0741	0.0119	0.1108	0.791	0.082	0.012	0.115
55	2034	562.8	5482.66	0.8029	0.0743	0.0109	0.1119	0.787	0.083	0.011	0.12
56	2052	561.9	5562.66	0.799	0.0729	0.0099	0.1182	0.782	0.083	0.01	0.124
57	2070	561.54	5614.8	0.7968	0.0723	0.009	0.1219	0.778	0.084	0.009	0.129
58	2088	563.17	5532.99	0.8028	0.0746	0.0089	0.1137	0.785	0.087	0.009	0.12
59	2106	564.79	5444.34	0.8085	0.077	0.0089	0.1056	0.791	0.089	0.009	0.111
60	2124	564.05	5524.01	0.805	0.0758	0.0079	0.1113	0.784	0.09	0.008	0.118
61	2142	564.42	5504.31	0.8063	0.0763	0.0079	0.1095	0.785	0.091	0.008	0.116
62	2160	564.42	5505.04	0.8063	0.0763	0.0079	0.1095	0.774	0.094	0.009	0.123
63	2178	564.07	5564.67	0.804	0.0757	0.0069	0.1134	0.772	0.098	0.007	0.123
64	2196	564.43	5545.88	0.8052	0.0763	0.0069	0.1116	0.771	0.099	0.012	0.118
65	2214	564.33	5551.21	0.8049	0.0761	0.0069	0.1121	0.77	0.098	0.012	0.12
66	2232	565.76	5473.4	0.8099	0.0782	0.0069	0.105	0.772	0.101	0.016	0.111
67	2250	565.76	5474.12	0.8098	0.0782	0.0069	0.105	0.77	0.095	0.023	0.112
SCFM315-12C G3
No.1	Distance (μm)2	T(°C)3	P(bars)4	Mod Alm5	Mod Prp6	Mod Sps7	Mod Grs8	Obs Alm9	Obs Prp10	Obs Sps11	Obs Grs12
1	1366.82	550.66	4272.68	0.765	0.0675	0.0884	0.0791	0.76	0.07	0.089	0.08
2	1345.79	550.89	4273.86	0.7659	0.0677	0.0876	0.0788	0.762	0.0695	0.088	0.0795
3	1324.76	551.1	4275.98	0.7668	0.0679	0.0868	0.0786	0.764	0.069	0.087	0.079
4	1303.74	551.13	4273.15	1000	0	0	0	0.763	0.0697	0.0873	0.079
5	1282.71	551.18	4268.49	0.7671	0.068	0.0867	0.0782	0.762	0.0703	0.0877	0.079
6	1261.68	551.22	4265.62	0.7672	0.068	0.0867	0.078	0.761	0.071	0.088	0.079
7	1240.65	551.22	4266.42	0.7672	0.068	0.0867	0.0781	0.759	0.071	0.09	0.08
8	1219.62	551.22	4267.21	0.7672	0.068	0.0866	0.0781	0.756	0.072	0.091	0.082
9	1198.6	550.9	4308.45	0.7659	0.0675	0.0865	0.0802	0.762	0.07	0.087	0.081
10	1177.57	550.98	4333.72	0.7661	0.0674	0.0854	0.081	0.763	0.07	0.086	0.082
11	1156.54	550.98	4334.53	0.7662	0.0674	0.0854	0.0811	0.758	0.069	0.089	0.083
12	1135.51	550.61	4370.12	1000	0	0	0	0.7595	0.0685	0.088	0.0835
13	1114.48	550.54	4376.96	0.7643	0.0667	0.0855	0.0835	0.761	0.068	0.087	0.084
14	1093.46	550.75	4357.95	0.7652	0.067	0.0854	0.0824	0.761	0.069	0.087	0.083
15	1072.43	550.98	4335.44	0.7662	0.0674	0.0853	0.0811	0.761	0.07	0.087	0.082
16	1051.4	550.69	4366.44	0.7649	0.0669	0.0853	0.0828	0.761	0.07	0.086	0.084
17	1030.37	550.72	4377.73	0.765	0.0669	0.0849	0.0832	0.7606	0.0701	0.0856	0.0845
18	1009.34	550.69	4388.07	0.7649	0.0668	0.0846	0.0837	0.7602	0.0703	0.0853	0.085
19	988.316	550.72	4399.4	0.765	0.0668	0.0841	0.0841	0.7599	0.0704	0.0849	0.0855
20	967.288	550.73	4410.41	0.7651	0.0667	0.0837	0.0845	0.7595	0.0705	0.0845	0.086
21	946.26	550.75	4421.03	0.7651	0.0667	0.0833	0.0849	0.7591	0.0706	0.0841	0.0865
22	925.232	550.76	4432.28	0.7651	0.0666	0.0829	0.0854	0.7588	0.0707	0.0837	0.087
23	904.204	550.77	4441.07	0.7652	0.0666	0.0825	0.0857	0.7584	0.0709	0.0834	0.0875
24	883.176	550.78	4451.98	0.7652	0.0665	0.0821	0.0862	0.758	0.071	0.083	0.088
25	862.148	550.63	4503.69	0.7645	0.0661	0.0808	0.0886	0.7563	0.071	0.0817	0.0907
26	841.12	550.51	4552.72	0.764	0.0657	0.0793	0.091	0.7547	0.071	0.0803	0.0933
27	820.092	550.35	4601.4	0.7633	0.0652	0.078	0.0934	0.753	0.071	0.079	0.096
28	799.064	550.92	4628	0.7656	0.0656	0.0752	0.0936	0.757	0.071	0.076	0.096
29	778.036	551.25	4675.06	0.7669	0.0657	0.0723	0.0952	0.759	0.0705	0.073	0.0975
30	757.008	551.58	4723.3	0.7681	0.0657	0.0693	0.0968	0.761	0.07	0.07	0.099
31	735.98	552.03	4784.4	0.7699	0.0658	0.0654	0.0988	0.763	0.07	0.066	0.101
32	714.952	553.84	4744.44	0.777	0.0678	0.0614	0.0937	0.769	0.073	0.062	0.096
33	693.924	553.58	4838.68	0.776	0.0671	0.0585	0.0985	0.768	0.072	0.059	0.101
34	672.896	554.11	4883.13	0.778	0.0673	0.0551	0.0996	0.7705	0.072	0.0555	0.102
35	651.868	554.65	4928.26	0.78	0.0676	0.0516	0.1008	0.773	0.072	0.052	0.103
36	630.84	556.64	4826.18	0.7877	0.0703	0.0497	0.0924	0.783	0.074	0.05	0.094
37	609.812	555.23	5102.61	0.7819	0.0673	0.0426	0.1082	0.771	0.074	0.043	0.112
38	588.784	555.75	5131.37	0.7837	0.0677	0.04	0.1087	0.7733	0.074	0.0403	0.1123
39	567.756	556.22	5161.78	0.7853	0.068	0.0374	0.1092	0.7757	0.074	0.0377	0.1127
40	546.728	556.73	5192.46	0.7871	0.0684	0.0348	0.1098	0.778	0.074	0.035	0.113
41	525.7	558.49	5155.01	0.7935	0.0705	0.0317	0.1043	0.781	0.078	0.032	0.108
42	504.672	558.13	5226.39	0.7919	0.0698	0.0298	0.1086	0.782	0.076	0.03	0.112
43	483.644	559.84	5220.73	0.7977	0.0717	0.0258	0.1048	0.788	0.078	0.026	0.108
44	462.616	560.73	5164.09	0.801	0.073	0.0258	0.1003	0.792	0.079	0.026	0.103
45	441.588	561.69	5181.97	0.8038	0.074	0.0229	0.0993	0.794	0.08	0.023	0.102
46	420.56	560.89	5345.25	0.7999	0.0724	0.0189	0.1089	0.789	0.08	0.019	0.113
47	399.532	561.24	5381.04	0.8005	0.0727	0.0169	0.11	0.789	0.08	0.017	0.114
48	378.504	562.43	5311.07	0.8048	0.0744	0.0168	0.104	0.794	0.081	0.017	0.107
49	357.476	562.46	5399.77	0.8036	0.0741	0.0139	0.1083	0.792	0.081	0.014	0.112
50	336.448	562.6	5424.3	0.8036	0.0742	0.0129	0.1093	0.791	0.082	0.013	0.115
51	315.42	561.91	5493.85	0.8005	0.0731	0.0119	0.1144	0.788	0.081	0.012	0.119
52	294.392	562.25	5475.9	1000	0	0	0	0.79	0.081	0.012	0.117
53	273.364	561.17	5561.63	0.7972	0.072	0.011	0.1198	0.798	0.071	0.011	0.119
54	252.336	561.82	5564.71	0.7988	0.0728	0.0099	0.1185	0.781	0.084	0.01	0.125
55	231.308	564.4	5426.48	1000	0	0	0	0.791	0.089	0.01	0.111
56	210.28	563.63	5505.36	0.8046	0.0753	0.0089	0.1112	0.784	0.0895	0.009	0.118
57	189.252	562.92	5580.88	0.8011	0.0742	0.0079	0.1168	0.777	0.09	0.008	0.125
58	168.224	563.28	5582.64	0.8018	0.0746	0.0074	0.1161	0.7748	0.093	0.0075	0.125
59	147.196	563.63	5585.36	0.8025	0.0751	0.0069	0.1155	0.7725	0.096	0.007	0.125
60	126.168	563.98	5588.98	0.8032	0.0756	0.0064	0.1148	0.7703	0.099	0.0065	0.125
61	105.14	564.33	5594.65	0.8037	0.076	0.0059	0.1144	0.768	0.102	0.006	0.125
62	84.112	565.9	5510.94	0.8092	0.0784	0.0059	0.1065	0.773	0.105	0.008	0.114
63	63.084	566.93	5452.34	1000	0	0	0	0.7755	0.107	0.0095	0.108
64	42.056	568	5387.16	0.8162	0.0816	0.0059	0.0963	0.778	0.109	0.011	0.102
65	21.028	568	5388	0.8162	0.0816	0.0059	0.0963	0.774	0.11	0.011	0.105
66	0	568.01	5388.83	0.8162	0.0816	0.0058	0.0964	0.779	0.107	0.018	0.097
SCFM315-17A G3
No.1	Distance (μm)2	T(°C)3	P(bars)4	Mod Alm5	Mod Prp6	Mod Sps7	Mod Grs8	Obs Alm9	Obs Prp10	Obs Sps11	Obs Grs12
1	0	568.78	4905.51	0.7624	0.0929	0.0745	0.0702	0.738	0.113	0.076	0.073
2	20	569.28	4861.52	0.7651	0.0939	0.0726	0.0684	0.74	0.114	0.074	0.071
3	40	569.17	4908.4	0.7642	0.0934	0.0725	0.0699	0.739	0.1135	0.0755	0.072
4	60	569.1	4933.52	0.7638	0.0931	0.0725	0.0707	0.738	0.113	0.077	0.073
5	80	569.28	4865.52	0.7651	0.0939	0.0726	0.0685	0.74	0.111	0.077	0.071
6	100	569.15	4914.87	0.7641	0.0933	0.0725	0.0701	0.736	0.114	0.077	0.073
7	120	568.55	5108.66	0.76	0.0911	0.0722	0.0766	0.748	0.097	0.077	0.078
8	140	568.98	4976.52	0.7629	0.0926	0.0724	0.0721	0.736	0.112	0.077	0.075
9	160	569.01	4964.88	0.7631	0.0928	0.0724	0.0717	0.738	0.111	0.0765	0.0745
10	180	569.02	4964.13	0.7632	0.0928	0.0724	0.0717	0.74	0.11	0.076	0.074
11	200	568.51	5121.03	0.7598	0.091	0.0722	0.0771	0.738	0.107	0.075	0.08
12	220	568.51	5123.57	0.7598	0.091	0.0721	0.0771	0.734	0.109	0.075	0.082
13	240	568.43	5146.03	0.7593	0.0907	0.072	0.078	0.737	0.106	0.075	0.081
14	260	568.45	5142.65	0.7594	0.0908	0.072	0.0778	0.736	0.108	0.076	0.081
15	280	568.44	5143.52	1000	0	0	0	0.743	0.101	0.075	0.08
16	300	568.5	5129.34	0.7597	0.0909	0.0721	0.0774	0.738	0.105	0.076	0.08
17	320	568.48	5135.16	0.7595	0.0908	0.0721	0.0776	0.742	0.104	0.074	0.08
18	340	568.2	5207.05	0.7578	0.09	0.0719	0.0802	0.74	0.1035	0.0735	0.083
19	360	567.9	5280.33	0.756	0.0891	0.0718	0.0831	0.738	0.103	0.073	0.086
20	380	568.29	5186.17	0.7584	0.0902	0.0719	0.0794	0.741	0.103	0.074	0.082
21	400	568.68	5079.6	0.7608	0.0915	0.0721	0.0756	0.743	0.105	0.075	0.078
22	420	568.46	5143.39	0.7594	0.0908	0.072	0.0779	0.743	0.102	0.074	0.081
23	440	568.8	5057.17	0.7615	0.0918	0.0719	0.0747	0.745	0.105	0.073	0.077
24	460	569.12	5185.54	0.7623	0.0913	0.068	0.0784	0.746	0.105	0.069	0.081
25	480	568.18	5403.58	0.7567	0.0886	0.0677	0.087	0.737	0.101	0.072	0.09
26	500	568.41	5356.15	1000	0	0	0	0.739	0.102	0.071	0.088
27	520	568.49	5338.66	0.7585	0.0894	0.0678	0.0843	0.7392	0.1027	0.0707	0.0873
28	540	568.58	5318.47	1000	0	0	0	0.7395	0.1035	0.0705	0.0865
29	560	568.67	5298.17	0.7595	0.0899	0.0678	0.0827	0.7397	0.1043	0.0703	0.0857
30	580	568.75	5278.49	0.76	0.0902	0.0678	0.0819	0.74	0.105	0.07	0.085
31	600	568.96	5484.43	0.76	0.089	0.0622	0.0888	0.743	0.102	0.063	0.092
32	620	568.94	5713.22	0.7589	0.0875	0.0562	0.0975	0.737	0.104	0.057	0.102
33	640	572.11	5510.57	0.7741	0.0929	0.0474	0.0855	0.753	0.11	0.048	0.089
34	660	573.47	5553.1	0.7798	0.0945	0.0405	0.0852	0.756	0.114	0.041	0.089
35	680	574.15	5556.49	0.7826	0.0954	0.0376	0.0844	0.76	0.114	0.038	0.088
36	700	575.16	5488.41	0.7872	0.0973	0.0346	0.0809	0.766	0.115	0.035	0.084
37	720	575.4	5633.8	0.7872	0.0967	0.0307	0.0854	0.765	0.115	0.031	0.089
38	740	576.61	5482.16	0.7929	0.0995	0.0287	0.0789	0.769	0.119	0.029	0.082
39	760	577.65	5408.92	0.7973	0.1015	0.0258	0.0754	0.776	0.119	0.026	0.078
40	780	577.98	5323.36	0.7992	0.1026	0.0258	0.0724	0.777	0.122	0.026	0.075
41	800	578.35	5423.41	0.7997	0.1025	0.0228	0.075	0.774	0.124	0.023	0.078
42	820	578.39	5476.22	0.7995	0.1022	0.0218	0.0765	0.771	0.127	0.022	0.08
43	840	578.53	5506.01	0.7997	0.1022	0.0208	0.0773	0.771	0.128	0.021	0.081
44	860	578.75	5515.57	0.8003	0.1025	0.0198	0.0773	0.77	0.129	0.02	0.081
45	880	579.13	5421.04	1000	0	0	0	0.77	0.132	0.021	0.077
SSFM307-7G G1
No.1	Distance (μm)2	T(°C)3	P(bars)4	Mod Alm5	Mod Prp6	Mod Sps7	Mod Grs8	Obs Alm9	Obs Prp10	Obs Sps11	Obs Grs12
1	2573.73	548.81	6089.38	0.6536	0.0643	0.1367	0.1454	0.656	0.063	0.136	0.144
2	2521.2	548.95	6078.42	0.6543	0.0645	0.1368	0.1445	0.654	0.064	0.138	0.144
3	2468.68	549.54	6100.66	0.6572	0.0649	0.1335	0.1444	0.657	0.065	0.1335	0.1445
4	2416.15	550.36	6133.83	0.6611	0.0655	0.1288	0.1445	0.66	0.066	0.129	0.145
5	2363.63	551.05	6137.12	0.6645	0.0662	0.1261	0.1432	0.665	0.066	0.126	0.143
6	2311.1	551.67	6167.82	0.6675	0.0666	0.1223	0.1436	0.669	0.066	0.122	0.143
7	2258.58	553.02	6144.68	0.6741	0.0682	0.1184	0.1394	0.67	0.07	0.119	0.141
8	2206.05	551.73	6246.79	0.6677	0.0662	0.118	0.1481	0.663	0.067	0.121	0.149
9	2153.53	551.87	6238.39	0.6684	0.0664	0.1179	0.1473	0.663	0.067	0.122	0.148
10	2101	551.87	6238.47	0.6684	0.0664	0.1179	0.1473	0.662	0.067	0.123	0.149
11	2048.48	551.87	6238.55	0.6684	0.0664	0.1179	0.1473	0.661	0.065	0.121	0.152
12	1995.95	551.87	6238.62	0.6684	0.0664	0.1179	0.1473	0.661	0.065	0.122	0.152
13	1943.43	551.87	6238.7	0.6684	0.0664	0.1179	0.1473	0.665	0.065	0.123	0.147
14	1890.9	551.87	6238.79	0.6684	0.0664	0.1178	0.1473	0.665	0.065	0.12	0.15
15	1838.38	551.87	6238.86	0.6684	0.0664	0.1178	0.1473	0.665	0.064	0.12	0.151
16	1785.85	550.77	6322.38	0.663	0.0648	0.1173	0.1549	0.665	0.064	0.117	0.154
17	1733.33	551.38	6304.07	0.666	0.0655	0.1162	0.1524	0.66	0.068	0.117	0.155
18	1680.8	550.75	6434.76	0.6629	0.0641	0.111	0.162	0.664	0.064	0.111	0.162
19	1628.28	551.37	6423.24	0.6659	0.0647	0.1096	0.1598	0.667	0.0645	0.1095	0.1595
20	1575.75	551.98	6411.3	0.6689	0.0654	0.1081	0.1575	0.67	0.065	0.108	0.157
21	1523.23	551.85	6444.26	0.6683	0.0651	0.1067	0.1599	0.666	0.066	0.107	0.161
22	1470.7	551.71	6475.9	0.6676	0.0648	0.1054	0.1623	0.662	0.067	0.106	0.165
23	1418.18	552.2	6484.46	0.67	0.0652	0.1032	0.1616	0.664	0.068	0.104	0.165
24	1365.65	552.23	6529.62	0.6701	0.0649	0.1005	0.1644	0.665	0.067	0.101	0.167
25	1313.13	558.46	6403.91	0.7002	0.0723	0.0853	0.1422	0.702	0.071	0.085	0.141
26	1260.6	555.01	6645.43	0.6834	0.0671	0.0845	0.165	0.665	0.07	0.096	0.169
27	1208.08	555.01	6645.5	0.6834	0.0671	0.0846	0.165	0.659	0.073	0.093	0.175
28	1155.55	555.47	6617.21	0.6856	0.0678	0.0847	0.162	0.661	0.076	0.093	0.171
29	1103.02	556.8	6528.39	0.6921	0.0697	0.085	0.1532	0.667	0.081	0.089	0.163
30	1050.5	557.75	6530.46	0.6967	0.0707	0.0815	0.1511	0.673	0.083	0.083	0.161
31	997.975	559.91	6435.28	0.7072	0.0737	0.0783	0.1408	0.679	0.09	0.08	0.151
32	945.45	561.35	6509.62	0.7139	0.0749	0.0694	0.1418	0.679	0.096	0.071	0.154
33	892.925	562.54	6457.2	0.7196	0.0765	0.0674	0.1364	0.679	0.103	0.069	0.149
34	840.4	564.32	6434.19	0.728	0.0787	0.0616	0.1316	0.689	0.105	0.063	0.143
35	787.875	566.86	6283.13	0.7403	0.0827	0.0577	0.1192	0.7	0.113	0.059	0.129
36	735.35	567.56	6310.43	0.7435	0.0834	0.0539	0.1192	0.702	0.114	0.055	0.129
37	682.825	568.28	6338.45	0.7466	0.0841	0.05	0.1193	0.704	0.115	0.051	0.129
38	630.3	568.06	6385.11	0.7455	0.0836	0.0491	0.1219	0.704	0.114	0.05	0.132
39	577.775	567.68	6448.11	0.7435	0.0827	0.0481	0.1257	0.698	0.116	0.049	0.137
40	525.25	569.35	6354.95	0.7514	0.0854	0.0452	0.1181	0.708	0.119	0.046	0.128
41	472.725	569.57	6405.29	0.7521	0.0854	0.0425	0.1201	0.726	0.103	0.043	0.127
42	420.2	572.63	6235.03	0.7661	0.0904	0.0364	0.1071	0.724	0.124	0.037	0.115
43	367.675	574.93	6052.28	0.7767	0.0946	0.0325	0.0962	0.728	0.136	0.033	0.103
44	315.15	577.14	5892.09	0.7864	0.0988	0.0276	0.0872	0.735	0.144	0.028	0.093
45	262.625	578.01	5820.19	0.7902	0.1005	0.0256	0.0836	0.739	0.147	0.026	0.089
46	210.1	578.01	5820.26	0.7902	0.1005	0.0256	0.0836	0.733	0.148	0.027	0.091
47	157.575	577.96	5830.19	0.79	0.1004	0.0256	0.084	0.729	0.148	0.033	0.09
48	105.05	579.72	5396.15	0.7997	0.1059	0.0258	0.0687	0.742	0.155	0.04	0.064
49	52.525	579.72	5396.15	0.7997	0.1059	0.0258	0.0687	0.7455	0.158	0.0345	0.0625
50	0	579.77	5398.66	1000	0	0	0	0.749	0.161	0.029	0.061
SSFM307-7G G3
No.1	Distance (μm)2	T(°C)3	P(bars)4	Mod Alm5	Mod Prp6	Mod Sps7	Mod Grs8	Obs Alm9	Obs Prp10	Obs Sps11	Obs Grs12
1	1476.14	553.57	6418.02	0.6775	0.067	0.1023	0.1532	0.68	0.066	0.102	0.152
2	1489.81	553.27	6485.97	0.6761	0.0663	0.0996	0.1581	0.672	0.068	0.1	0.16
3	1503.48	552.96	6524.37	0.6746	0.0657	0.0984	0.1613	0.668	0.068	0.099	0.164
4	1517.15	553.71	6475.76	0.6782	0.0668	0.0986	0.1564	0.673	0.068	0.101	0.158
5	1530.82	553.13	6530.97	0.6754	0.0658	0.0975	0.1613	0.672	0.068	0.098	0.164
6	1544.48	552.82	6599.63	0.6739	0.0651	0.0945	0.1665	0.67	0.067	0.095	0.169
7	1558.15	553.94	6530.18	0.6793	0.0667	0.0948	0.1592	0.672	0.067	0.1	0.16
8	1571.82	554.07	6521.37	0.68	0.0669	0.0948	0.1584	0.671	0.07	0.098	0.162
9	1585.49	554.06	6522.66	0.6799	0.0668	0.0948	0.1585	0.669	0.072	0.096	0.164
10	1599.16	554.06	6523.44	0.6799	0.0668	0.0947	0.1585	0.67	0.068	0.099	0.163
11	1612.82	553.84	6538.11	1000	0	0	0	0.67	0.068	0.099	0.162
12	1626.49	552.38	6626.75	1000	0	0	0	0.67	0.065	0.095	0.17
13	1640.16	554.07	6522.86	1000	0	0	0	0.674	0.068	0.098	0.159
14	1653.83	553.57	6555.46	0.6775	0.0661	0.0946	0.1618	0.671	0.068	0.098	0.164
15	1667.5	553.57	6556.25	0.6775	0.0661	0.0945	0.1618	0.667	0.067	0.098	0.168
16	1681.16	552.06	6646.44	0.6702	0.064	0.0942	0.1716	0.666	0.065	0.096	0.173
17	1694.83	552.07	6647.19	0.6702	0.064	0.0941	0.1716	0.665	0.064	0.096	0.175
18	1708.5	551.28	6689.9	0.6665	0.063	0.0939	0.1767	0.664	0.063	0.096	0.177
19	1722.17	552.24	6637.53	0.6711	0.0643	0.0941	0.1705	0.665	0.065	0.099	0.172
20	1735.84	552.1	6645.65	0.6704	0.0641	0.0941	0.1715	0.667	0.065	0.095	0.173
21	1749.5	551.94	6656.75	0.6696	0.0638	0.0939	0.1726	0.669	0.064	0.094	0.173
22	1763.17	552.22	6641.19	1000	0	0	0	0.668	0.065	0.095	0.172
23	1776.84	550.91	6727.84	0.6647	0.0623	0.0926	0.1804	0.66	0.064	0.093	0.183
24	1790.51	549.48	6853.58	0.6578	0.0601	0.0883	0.1937	0.649	0.063	0.089	0.199
25	1804.18	549.88	6836.18	0.6597	0.0606	0.0884	0.1912	0.652	0.062	0.092	0.194
26	1817.84	549.9	6838.84	0.6599	0.0606	0.0882	0.1913	0.649	0.063	0.089	0.199
27	1831.51	549.95	6843.45	0.6601	0.0606	0.0877	0.1916	0.642	0.062	0.089	0.207
28	1845.18	549.39	6911.74	0.6574	0.0596	0.0845	0.1984	0.649	0.062	0.085	0.203
29	1858.85	549.53	6905.72	1000	0	0	0	0.648	0.062	0.088	0.202
30	1872.52	551.06	6838.47	0.6654	0.0618	0.0849	0.1879	0.652	0.066	0.087	0.195
31	1886.18	551.06	6839.21	0.6654	0.0618	0.0848	0.1879	0.653	0.066	0.088	0.194
32	1899.85	551.07	6839.95	0.6655	0.0618	0.0848	0.188	0.665	0.065	0.087	0.183
33	1913.52	551.08	6840.69	0.6655	0.0618	0.0847	0.188	0.663	0.064	0.087	0.185
34	1927.19	551.15	6847.84	0.6659	0.0618	0.084	0.1883	0.651	0.066	0.085	0.198
35	1940.86	551.16	6849.62	0.6659	0.0618	0.0838	0.1884	0.663	0.065	0.084	0.188
36	1954.52	551.17	6850.36	0.666	0.0618	0.0838	0.1884	0.661	0.066	0.085	0.188
37	1968.19	552.68	6776.51	0.6732	0.0638	0.0841	0.1788	0.667	0.066	0.085	0.182
38	1981.86	553.09	6755.02	0.6752	0.0644	0.0842	0.1762	0.665	0.067	0.087	0.18
39	1995.53	551.36	6879.03	0.6669	0.0618	0.0813	0.19	0.654	0.066	0.082	0.197
40	2009.2	550.37	6938.32	0.6621	0.0604	0.08	0.1975	0.643	0.067	0.081	0.209
41	2022.86	550.88	6916.26	1000	0	0	0	0.653	0.065	0.081	0.201
42	2036.53	550.73	6950.26	0.6639	0.0607	0.0782	0.1972	0.65	0.066	0.079	0.207
43	2050.2	550.6	6997.28	0.6633	0.0603	0.0752	0.2013	0.646	0.066	0.076	0.212
44	2063.87	550.81	6989.27	0.6643	0.0606	0.0752	0.2	0.647	0.066	0.077	0.21
45	2077.54	551.97	6988.17	0.6698	0.0617	0.0722	0.1963	0.652	0.068	0.073	0.207
46	2091.2	553.55	6917.07	1000	0	0	0	0.66	0.07	0.074	0.196
47	2104.87	555.84	6809.13	0.6884	0.0669	0.0723	0.1724	0.674	0.073	0.073	0.18
48	2118.54	556.24	6791.3	0.6904	0.0674	0.072	0.1701	0.671	0.076	0.073	0.18
49	2132.21	556.26	6805.22	0.6904	0.0674	0.0711	0.171	0.674	0.075	0.072	0.18
50	2145.88	557.05	6795.45	0.6942	0.0683	0.0692	0.1683	0.677	0.076	0.07	0.177
51	2159.54	557.08	6809.8	0.6943	0.0682	0.0682	0.1692	0.68	0.075	0.069	0.177
52	2173.21	558.79	6802.15	0.7025	0.0701	0.0631	0.1643	0.679	0.081	0.064	0.175
53	2186.88	559.13	6781.92	0.7041	0.0706	0.0631	0.1621	0.682	0.081	0.064	0.172
54	2200.55	557.35	6896.8	0.6955	0.068	0.0622	0.1743	0.675	0.077	0.063	0.185
55	2214.22	557.79	6907.01	0.6976	0.0684	0.0602	0.1738	0.677	0.078	0.061	0.185
56	2227.88	560.84	6783.42	0.7122	0.0725	0.0573	0.158	0.69	0.084	0.058	0.168
57	2241.55	561.09	6842.13	0.7133	0.0725	0.0533	0.161	0.687	0.086	0.054	0.173
58	2255.22	562.1	6797.77	0.7181	0.0739	0.0523	0.1558	0.693	0.088	0.053	0.167
59	2268.89	562.59	6822.08	0.7203	0.0743	0.0493	0.1561	0.695	0.088	0.05	0.167
60	2282.56	563.31	6813.57	0.7236	0.0752	0.0474	0.1538	0.698	0.09	0.048	0.165
61	2296.22	564.01	6805.33	0.7268	0.0761	0.0454	0.1517	0.7	0.092	0.046	0.163
62	2309.89	565.06	6750.93	0.7318	0.0777	0.0444	0.1461	0.704	0.095	0.045	0.157
63	2323.56	566.06	6696.32	0.7366	0.0792	0.0434	0.1408	0.708	0.097	0.044	0.151
64	2337.23	567.41	6652.7	0.7428	0.0811	0.0405	0.1356	0.718	0.097	0.041	0.144
65	2350.9	567.69	6699.58	0.7438	0.0812	0.0375	0.1375	0.717	0.099	0.038	0.147
66	2364.56	568.03	6741.51	0.745	0.0814	0.0346	0.139	0.716	0.1	0.035	0.149
67	2378.23	568.87	6744.91	0.7486	0.0824	0.0316	0.1374	0.715	0.104	0.032	0.148
68	2391.9	569.05	6803.63	0.7489	0.0823	0.0286	0.1401	0.711	0.108	0.029	0.153
69	2405.57	572.04	6588.52	0.7628	0.0875	0.0267	0.123	0.728	0.113	0.027	0.132
70	2419.24	572.39	6612.81	0.764	0.0878	0.0247	0.1235	0.728	0.115	0.025	0.133
71	2432.9	573.1	6632.61	0.7665	0.0887	0.0218	0.123	0.728	0.117	0.022	0.133
72	2446.57	574.44	6524.17	0.7726	0.0912	0.0208	0.1155	0.735	0.121	0.021	0.124
73	2460.24	575.91	6384.82	0.7793	0.0941	0.0198	0.1068	0.742	0.124	0.02	0.114
74	2473.91	575.92	6383.98	0.7793	0.0941	0.0198	0.1068	0.749	0.125	0.024	0.103
75	2487.58	577.55	6156.9	0.7873	0.0977	0.0198	0.0952	0.751	0.129	0.02	0.101
76	2501.24	577.55	6157.72	0.7873	0.0977	0.0198	0.0952	0.749	0.126	0.021	0.103
77	2514.91	576.9	6293.33	0.7837	0.096	0.0188	0.1015	0.746	0.127	0.019	0.108
78	2528.58	576.99	6323.04	0.7836	0.096	0.0178	0.1025	0.744	0.13	0.018	0.109
79	2542.25	576.99	6323.75	0.7836	0.096	0.0178	0.1026	0.749	0.128	0.018	0.105
80	2555.92	577.76	6304.75	0.7863	0.0973	0.0158	0.1006	0.748	0.129	0.016	0.107
81	2569.58	578.25	6280.01	0.7882	0.0982	0.0149	0.0988	0.747	0.132	0.015	0.105
82	2583.25	578.26	6282.17	0.7881	0.0982	0.0148	0.0989	0.746	0.132	0.015	0.108
83	2596.92	578.26	6283.01	0.7881	0.0982	0.0148	0.0989	0.74	0.13	0.016	0.114
84	2610.59	578.26	6283.85	0.7881	0.0982	0.0147	0.0989	0.743	0.135	0.017	0.105
85	2624.26	578.73	6214.43	1000	0	0	0	0.744	0.137	0.016	0.102
86	2637.92	578.51	6248.05	0.7893	0.0988	0.0148	0.0972	0.742	0.137	0.017	0.104
87	2651.59	578.51	6248.89	0.7893	0.0988	0.0147	0.0972	0.749	0.141	0.018	0.093
88	2665.26	579.99	6004.36	0.7966	0.1024	0.0148	0.0862	0.747	0.143	0.019	0.092
89	2678.93	580.1	5984.17	1000	0	0	0	0.744	0.145	0.02	0.091
90	2692.6	580.01	6001.39	0.7966	0.1025	0.0148	0.0861	0.741	0.143	0.024	0.092
91	2706.26	581.9	5574.48	0.8065	0.1081	0.0149	0.0705	0.751	0.149	0.026	0.074
92	2719.93	581.92	5574.55	0.8066	0.1081	0.0148	0.0705	0.754	0.15	0.027	0.068
93	2733.6	581.91	5575.31	0.8065	0.1081	0.0148	0.0705	0.749	0.148	0.031	0.072
94	2747.27	581.76	5617.88	0.8057	0.1076	0.0148	0.0719	0.744	0.146	0.034	0.076
95	2760.94	581.85	5594.09	0.8062	0.1079	0.0148	0.0711	0.746	0.145	0.034	0.075
96	2774.6	581.63	5652.02	0.805	0.1072	0.0148	0.0731	0.74	0.144	0.038	0.077
97	2788.27	581.63	5652.76	0.805	0.1072	0.0148	0.0731	0.74	0.142	0.038	0.08
98	2801.94	581.33	5727.61	0.8034	0.1062	0.0148	0.0756	0.738	0.144	0.039	0.08
99	2815.61	581.33	5728.36	0.8034	0.1062	0.0148	0.0757	0.739	0.143	0.038	0.08
100	2829.28	580.89	5830.32	0.801	0.1049	0.0147	0.0794	0.743	0.146	0.037	0.076
101	2842.94	581.92	5576.38	1000	0	0	0	0.746	0.148	0.035	0.071
102	2856.61	581.93	5576.38	0.8066	0.1081	0.0148	0.0705	0.756	0.156	0.037	0.051
103	2870.28	581.94	5576.44	0.8066	0.1082	0.0147	0.0705	0.754	0.153	0.035	0.058
104	2883.95	581.94	5578.01	0.8066	0.1081	0.0147	0.0706	0.734	0.18	0.03	0.056
105	2897.62	581.96	5578.14	0.8066	0.1082	0.0147	0.0705	0.746	0.153	0.033	0.068
106	2911.28	582.02	5582.45	0.8067	0.1083	0.0144	0.0706	0.756	0.152	0.029	0.064
107	2924.95	582	5582.65	0.8067	0.1082	0.0144	0.0706	0.761	0.143	0.026	0.071
SSFM307-7G G4
No.1	Distance (μm)2	T(°C)3	P(bars)4	Mod Alm5	Mod Prp6	Mod Sps7	Mod Grs8	Obs Alm9	Obs Prp10	Obs Sps11	Obs Grs12
1	2535.7	552.72	6090.93	0.6735	0.0681	0.1214	0.137	0.663	0.073	0.123	0.141
2	2507.21	552.64	6108.56	0.6731	0.0679	0.1208	0.1382	0.6637	0.0723	0.1223	0.1417
3	2478.72	552.6	6121.84	0.6729	0.0678	0.1203	0.139	0.6643	0.0717	0.1217	0.1423
4	2450.23	552.51	6139.06	0.6724	0.0676	0.1198	0.1401	0.665	0.071	0.121	0.143
5	2421.73	552.07	6175.36	0.6702	0.0669	0.1197	0.1432	0.66	0.07	0.124	0.146
6	2393.24	552.07	6176.2	0.6702	0.0669	0.1197	0.1432	0.656	0.069	0.128	0.147
7	2364.75	552.07	6177.04	0.6702	0.0669	0.1196	0.1433	0.653	0.07	0.129	0.148
8	2336.26	551.66	6209.23	0.6682	0.0663	0.1195	0.146	0.656	0.068	0.127	0.148
9	2307.77	551.67	6208.63	0.6682	0.0663	0.1195	0.146	0.653	0.068	0.131	0.148
10	2279.28	551.54	6218.25	0.6676	0.0661	0.1194	0.1468	0.654	0.0673	0.1307	0.1483
11	2250.79	551.41	6228.46	0.6669	0.0659	0.1194	0.1477	0.655	0.0667	0.1303	0.1487
12	2222.3	551.31	6235.97	0.6665	0.0658	0.1194	0.1484	0.656	0.066	0.13	0.149
13	2193.81	550.93	6263.72	0.6646	0.0652	0.1192	0.1509	0.653	0.065	0.131	0.151
14	2165.32	551.41	6228.16	1000	0	0	0	0.657	0.066	0.129	0.148
15	2136.82	550.3	6308.02	0.6615	0.0643	0.119	0.1551	0.653	0.064	0.127	0.155
16	2108.33	550.3	6308.85	0.6615	0.0643	0.119	0.1552	0.654	0.065	0.125	0.156
17	2079.84	550.68	6282.55	0.6634	0.0649	0.1191	0.1527	0.655	0.065	0.127	0.153
18	2051.35	550.58	6289.88	0.6629	0.0647	0.1191	0.1533	0.656	0.065	0.126	0.154
19	2022.86	550.57	6290.6	0.6629	0.0647	0.119	0.1534	0.651	0.064	0.128	0.157
20	1994.37	550.05	6326.37	0.6603	0.064	0.1189	0.1569	0.654	0.064	0.125	0.157
21	1965.88	555.46	6102.85	0.6869	0.0709	0.1102	0.1321	0.663	0.084	0.113	0.14
22	1937.39	551.37	6420.29	0.6667	0.0647	0.109	0.1596	0.655	0.064	0.123	0.159
23	1908.9	551.65	6401.58	1000	0	0	0	0.653	0.064	0.126	0.157
24	1880.41	551.48	6413.03	0.6672	0.0648	0.1091	0.1589	0.657	0.064	0.121	0.158
25	1851.91	552.17	6366.8	0.6706	0.0658	0.1093	0.1543	0.657	0.067	0.12	0.156
26	1823.42	552.06	6374.53	0.6701	0.0657	0.1092	0.155	0.659	0.0655	0.118	0.157
27	1794.93	552.06	6375.26	0.6701	0.0657	0.1092	0.1551	0.661	0.064	0.116	0.158
28	1766.44	551.3	6425.92	0.6664	0.0646	0.109	0.1601	0.659	0.065	0.115	0.161
29	1737.95	551.33	6423.64	0.6665	0.0646	0.109	0.1599	0.662	0.063	0.117	0.158
30	1709.46	551.4	6419.18	0.6669	0.0647	0.109	0.1594	0.658	0.066	0.115	0.161
31	1680.97	551.41	6419.95	0.6669	0.0647	0.1089	0.1595	0.658	0.064	0.116	0.162
32	1652.48	551.56	6410.32	0.6676	0.0649	0.109	0.1585	0.663	0.066	0.112	0.16
33	1623.99	551.74	6408.42	0.6685	0.0651	0.1084	0.1579	0.664	0.067	0.109	0.16
34	1595.5	552.01	6424.52	0.6698	0.0653	0.1066	0.1583	0.664	0.0677	0.1073	0.161
35	1567	552.24	6440.08	0.6709	0.0654	0.1049	0.1587	0.664	0.0683	0.1057	0.162
36	1538.51	552.5	6456.5	0.6722	0.0656	0.1031	0.1591	0.664	0.069	0.104	0.163
37	1510.02	553.22	6466.53	0.6757	0.0663	0.1001	0.158	0.666	0.07	0.101	0.162
38	1481.53	554.02	6451.55	0.6796	0.0672	0.0981	0.1551	0.67	0.071	0.099	0.159
39	1453.04	554.8	6430.1	0.6834	0.0681	0.0965	0.152	0.6707	0.0737	0.0977	0.1573
40	1424.55	555.52	6411.99	0.6869	0.069	0.0949	0.1492	0.6713	0.0763	0.0963	0.1557
41	1396.06	556.19	6393.38	0.6902	0.0698	0.0934	0.1466	0.672	0.079	0.095	0.154
42	1367.57	557.6	6328.33	0.6971	0.0717	0.0914	0.1398	0.677	0.082	0.093	0.147
43	1339.08	557.75	6357.8	0.6978	0.0717	0.0894	0.1412	0.677	0.083	0.091	0.149
44	1310.59	561.55	6195.12	0.7164	0.0769	0.0818	0.1249	0.679	0.102	0.084	0.135
45	1282.09	559.76	6362.27	0.7075	0.0739	0.0815	0.1371	0.681	0.086	0.088	0.145
46	1253.6	559.88	6356.72	0.7081	0.074	0.0813	0.1366	0.681	0.09	0.083	0.146
47	1225.11	559.88	6357.56	0.7081	0.074	0.0812	0.1366	0.688	0.083	0.084	0.145
48	1196.62	561.14	6288.94	0.7143	0.0759	0.0794	0.1304	0.6895	0.091	0.081	0.1385
49	1168.13	562.78	6208.81	0.7223	0.0782	0.0762	0.1232	0.691	0.099	0.078	0.132
50	1139.64	561.63	6321.88	0.7166	0.0762	0.076	0.1312	0.685	0.096	0.078	0.141
51	1111.15	563.06	6320.92	0.7234	0.0778	0.0704	0.1283	0.691	0.099	0.072	0.138
52	1082.66	563.3	6367.38	0.7245	0.0778	0.0675	0.1302	0.689	0.102	0.069	0.141
53	1054.17	564.72	6302.08	0.7313	0.0799	0.0646	0.1242	0.696	0.105	0.066	0.134
54	1025.68	565.4	6248.46	0.7347	0.081	0.064	0.1203	0.7125	0.0965	0.065	0.127
55	997.185	565.95	6201.13	0.7374	0.082	0.0635	0.1171	0.729	0.088	0.064	0.12
56	968.694	566.31	6260.56	0.7389	0.0821	0.0598	0.1193	0.698	0.111	0.061	0.129
57	940.203	566.89	6200.34	0.7418	0.0831	0.0596	0.1154	0.698	0.117	0.061	0.125
58	911.712	567.36	6278.73	0.7437	0.0832	0.0548	0.1182	0.7	0.115	0.056	0.128
59	883.221	568.11	6234.9	0.7473	0.0844	0.0534	0.1149	0.7045	0.116	0.0545	0.124
60	854.73	568.85	6188.99	0.7509	0.0856	0.052	0.1115	0.709	0.117	0.053	0.12
61	826.239	569.28	6135.83	0.7531	0.0865	0.052	0.1085	0.7133	0.1167	0.053	0.1163
62	797.748	569.71	6081.92	0.7552	0.0873	0.052	0.1055	0.7177	0.1163	0.053	0.1127
63	769.257	570.14	6021.83	0.7574	0.0883	0.052	0.1023	0.722	0.116	0.053	0.109
64	740.766	569.56	6245.85	0.7539	0.0861	0.0471	0.1129	0.709	0.121	0.048	0.122
65	712.275	570.09	6180.96	0.7565	0.0872	0.0472	0.1091	0.716	0.117	0.05	0.117
66	683.784	570.78	6090.84	0.76	0.0886	0.0472	0.1042	0.725	0.116	0.048	0.111
67	655.293	570.8	6101.07	0.7601	0.0886	0.0467	0.1046	0.715	0.123	0.048	0.115
68	626.802	571.39	6070.08	0.7628	0.0896	0.0453	0.1024	0.727	0.118	0.046	0.109
69	598.311	572.15	5992.82	0.7665	0.091	0.0443	0.0981	0.733	0.118	0.045	0.104
70	569.82	572.24	5981.48	0.767	0.0912	0.0442	0.0975	0.726	0.124	0.045	0.104
71	541.329	572.85	5958.67	0.7698	0.0922	0.0423	0.0958	0.728	0.127	0.043	0.102
72	512.838	572.41	6027.42	0.7675	0.0912	0.0422	0.0991	0.724	0.127	0.043	0.106
73	484.347	573.23	5897.72	0.7717	0.0931	0.0423	0.0929	0.729	0.129	0.043	0.099
74	455.856	574.2	5892.41	0.7759	0.0944	0.0383	0.0914	0.733	0.131	0.039	0.097
75	427.365	573.79	5960.67	0.7738	0.0934	0.0383	0.0945	0.728	0.131	0.041	0.101
76	398.874	574.14	5903.03	0.7755	0.0943	0.0383	0.0919	0.73	0.133	0.039	0.098
77	370.383	574.55	5870.51	0.7775	0.095	0.0374	0.0901	0.733	0.134	0.038	0.096
78	341.892	574.79	5827.66	0.7787	0.0956	0.0374	0.0883	0.732	0.136	0.038	0.094
79	313.401	574.8	5826.67	0.7788	0.0957	0.0374	0.0882	0.73	0.135	0.04	0.094
80	284.91	575.67	5652.17	0.7835	0.098	0.0374	0.0811	0.738	0.138	0.038	0.086
81	256.419	575.88	5604.19	1000	0	0	0	0.739	0.138	0.039	0.084
82	227.928	576.38	5479.38	0.7875	0.1001	0.0375	0.0749	0.741	0.14	0.04	0.079
83	199.437	576.39	5480.1	0.7875	0.1001	0.0375	0.0749	0.737	0.144	0.039	0.08
84	170.946	577.29	5196.65	0.7932	0.1034	0.0376	0.0658	0.743	0.148	0.041	0.068
85	142.455	577.3	5196.71	0.7932	0.1034	0.0376	0.0658	0.746	0.147	0.04	0.066
86	113.964	577.3	5196.74	0.7932	0.1034	0.0376	0.0658	0.743	0.147	0.039	0.071
87	85.473	576.81	5429.22	0.7896	0.1011	0.0364	0.0729	0.74	0.146	0.037	0.077
88	56.982	577.87	5244.76	0.795	0.1039	0.0346	0.0665	0.7435	0.154	0.0345	0.068
89	28.491	577.9	5246.94	0.795	0.104	0.0345	0.0665	0.747	0.162	0.032	0.059
90	0	577.96	5251.29	0.7951	0.104	0.0342	0.0666	0.757	0.151	0.032	0.06
SSFM307-7G G5
No.1	Distance (μm)2	T(°C)3	P(bars)4	Mod Alm5	Mod Prp6	Mod Sps7	Mod Grs8	Obs Alm9	Obs Prp10	Obs Sps11	Obs Grs12
1	1587.88	549.41	6215.68	0.6573	0.064	0.1275	0.1512	0.659	0.063	0.127	0.15
2	1573.04	550.79	6128.35	0.6641	0.0659	0.127	0.143	0.664	0.066	0.127	0.143
3	1558.2	549.96	6192.69	0.66	0.0647	0.1267	0.1486	0.657	0.065	0.129	0.149
4	1543.36	549.97	6191.94	0.66	0.0647	0.1267	0.1485	0.66	0.063	0.13	0.146
5	1528.52	550.61	6165.44	0.6632	0.0655	0.1258	0.1455	0.662	0.066	0.126	0.146
6	1513.68	550.61	6166.18	0.6632	0.0655	0.1257	0.1455	0.657	0.065	0.128	0.149
7	1498.84	549.74	6230.8	1000	0	0	0	0.66	0.064	0.126	0.151
8	1484	551	6246.45	0.665	0.0654	0.1202	0.1494	0.666	0.065	0.12	0.149
9	1469.16	551.02	6245.82	0.6651	0.0654	0.1201	0.1493	0.6646	0.065	0.1214	0.149
10	1454.32	551	6247.31	1000	0	0	0	0.6632	0.065	0.1228	0.149
11	1439.48	551.03	6245.54	0.6651	0.0655	0.1201	0.1493	0.6618	0.065	0.1242	0.149
12	1424.64	551.01	6246.65	0.6651	0.0654	0.1201	0.1494	0.6604	0.065	0.1256	0.149
13	1409.8	551.03	6245.79	0.6651	0.0655	0.1201	0.1493	0.659	0.065	0.127	0.149
14	1394.96	551.02	6246.5	0.6651	0.0654	0.1201	0.1494	0.661	0.064	0.124	0.151
15	1380.12	550.78	6264.49	1000	0	0	0	0.66	0.065	0.123	0.151
16	1365.28	550.9	6256.04	0.6645	0.0653	0.12	0.1502	0.662	0.066	0.121	0.151
17	1350.44	550.9	6256.86	0.6645	0.0653	0.12	0.1503	0.66	0.066	0.122	0.152
18	1335.6	550.44	6290.18	0.6623	0.0646	0.1198	0.1534	0.658	0.066	0.121	0.155
19	1320.76	550.78	6266.42	0.6639	0.0651	0.1199	0.1511	0.661	0.066	0.121	0.152
20	1305.92	550.96	6257.83	0.6648	0.0653	0.1197	0.1502	0.663	0.066	0.12	0.151
21	1291.08	550.71	6275.54	0.6636	0.065	0.1196	0.1518	0.661	0.065	0.1215	0.152
22	1276.24	550.72	6276.35	0.6636	0.065	0.1196	0.1519	0.659	0.064	0.123	0.153
23	1261.4	550.13	6323.66	0.6608	0.0641	0.119	0.1562	0.661	0.064	0.119	0.156
24	1246.56	551.16	6251.23	0.6658	0.0656	0.1193	0.1493	0.662	0.067	0.12	0.151
25	1231.72	551.17	6251.98	0.6658	0.0656	0.1193	0.1494	0.658	0.066	0.122	0.154
26	1216.88	550.64	6300.28	0.6632	0.0647	0.1186	0.1535	0.66	0.066	0.119	0.155
27	1202.04	550.74	6293.03	1000	0	0	0	0.66	0.066	0.12	0.154
28	1187.2	550.63	6300.74	0.6632	0.0647	0.1186	0.1536	0.659	0.065	0.122	0.154
29	1172.36	550.67	6299.9	0.6634	0.0648	0.1185	0.1534	0.662	0.065	0.121	0.152
30	1157.52	551.58	6332.56	0.6678	0.0655	0.1135	0.1533	0.664	0.067	0.114	0.155
31	1142.68	552.18	6356.68	0.6707	0.0659	0.11	0.1533	0.667	0.0675	0.1105	0.155
32	1127.84	552.8	6380.89	0.6737	0.0664	0.1065	0.1533	0.67	0.068	0.107	0.155
33	1113	552.88	6375.42	1000	0	0	0	0.668	0.068	0.1095	0.1545
34	1098.16	552.97	6369.06	0.6746	0.0667	0.1066	0.1522	0.666	0.068	0.112	0.154
35	1083.32	552.71	6387.25	0.6733	0.0663	0.1065	0.1539	0.666	0.068	0.11	0.156
36	1068.48	553.04	6405.81	0.6749	0.0665	0.1043	0.1543	0.669	0.069	0.105	0.157
37	1053.64	552.55	6439.56	0.6725	0.0658	0.1042	0.1576	0.665	0.068	0.106	0.16
38	1038.8	552.6	6438.74	0.6727	0.0658	0.1041	0.1574	0.664	0.0695	0.1055	0.161
39	1023.96	552.77	6433.87	0.6736	0.066	0.1037	0.1567	0.663	0.071	0.105	0.162
40	1009.12	553.44	6417.94	0.6768	0.0668	0.1022	0.1541	0.666	0.072	0.1035	0.1593
41	994.28	554.13	6400.06	0.6802	0.0676	0.1008	0.1514	0.669	0.073	0.102	0.1565
42	979.44	554.81	6381.51	0.6835	0.0685	0.0993	0.1487	0.672	0.074	0.1005	0.1538
43	964.6	555.49	6362.66	0.6868	0.0693	0.0978	0.1461	0.675	0.075	0.099	0.151
44	949.76	555.64	6428.72	0.6875	0.069	0.0938	0.1496	0.675	0.075	0.095	0.155
45	934.92	556.07	6396.37	1000	0	0	0	0.672	0.077	0.098	0.153
46	920.08	555.39	6448.67	0.6863	0.0687	0.0936	0.1514	0.67	0.076	0.095	0.158
47	905.24	555.57	6452.57	0.6872	0.0688	0.0928	0.1512	0.675	0.075	0.094	0.157
48	890.4	555.71	6466.34	0.6879	0.0689	0.0916	0.1517	0.671	0.077	0.093	0.159
49	875.56	556.6	6498.16	0.6922	0.0696	0.0867	0.1515	0.675	0.078	0.088	0.159
50	860.72	556.93	6533	0.6937	0.0698	0.0836	0.1529	0.676	0.079	0.085	0.161
51	845.88	557.1	6521.24	0.6945	0.07	0.0837	0.1518	0.672	0.081	0.086	0.161
52	831.04	558.12	6489.46	0.6995	0.0713	0.0817	0.1476	0.679	0.082	0.083	0.156
53	816.2	558.55	6458.71	0.7016	0.072	0.0816	0.1448	0.681	0.083	0.083	0.153
54	801.36	559.11	6497.35	0.7042	0.0723	0.0776	0.1458	0.68	0.085	0.079	0.155
55	786.52	560.64	6441.1	0.7117	0.0744	0.0747	0.1393	0.688	0.088	0.076	0.148
56	771.68	560.98	6434.61	0.7133	0.0748	0.0736	0.1382	0.689	0.089	0.075	0.147
57	756.84	561.16	6482.34	0.7141	0.0747	0.0707	0.1404	0.688	0.09	0.072	0.15
58	742	562.15	6484.42	0.7188	0.0758	0.0669	0.1385	0.696	0.09	0.068	0.147
59	727.16	562.16	6485.14	0.7188	0.0758	0.0668	0.1385	0.692	0.093	0.069	0.146
60	712.32	562.42	6527.95	0.72	0.0759	0.0638	0.1403	0.691	0.094	0.065	0.151
61	697.48	563.58	6427.99	0.7257	0.0778	0.064	0.1325	0.699	0.094	0.066	0.141
62	682.64	563.56	6477.13	0.7255	0.0775	0.0619	0.1351	0.697	0.096	0.063	0.145
63	667.8	565.06	6412.24	0.7327	0.0796	0.0589	0.1287	0.702	0.1	0.06	0.138
64	652.96	564.51	6463.19	0.73	0.0787	0.0588	0.1324	0.695	0.101	0.061	0.143
65	638.12	566.14	6356.84	0.7379	0.0813	0.0569	0.1239	0.705	0.104	0.058	0.133
66	623.28	566.55	6413.28	0.7396	0.0814	0.0531	0.1259	0.708	0.103	0.054	0.135
67	608.44	567.9	6352.15	0.746	0.0835	0.0501	0.1204	0.713	0.107	0.051	0.129
68	593.6	569.27	6310.37	0.7524	0.0854	0.0462	0.116	0.718	0.111	0.047	0.124
69	578.76	569.53	6309.5	0.7536	0.0858	0.0452	0.1154	0.716	0.114	0.046	0.124
70	563.92	570.44	6261.98	0.7578	0.0872	0.0433	0.1117	0.719	0.117	0.044	0.12
71	549.08	570.86	6299.49	0.7594	0.0875	0.0403	0.1127	0.721	0.117	0.041	0.121
72	534.24	572.22	6191.57	0.7659	0.0899	0.0384	0.1058	0.728	0.12	0.039	0.113
73	519.4	572.06	6243.2	0.7649	0.0894	0.0374	0.1082	0.724	0.121	0.038	0.116
74	504.56	572.23	6222.57	0.7658	0.0898	0.0374	0.1071	0.722	0.124	0.038	0.115
75	489.72	572.88	6201.71	0.7686	0.0908	0.0355	0.1051	0.7245	0.1265	0.036	0.1125
76	474.88	573.64	6167.55	0.772	0.092	0.0335	0.1025	0.727	0.129	0.034	0.11
77	460.04	574.09	6102.51	0.7743	0.093	0.0335	0.0992	0.733	0.128	0.034	0.106
78	445.2	574.61	6099.64	0.7764	0.0937	0.0315	0.0983	0.733	0.129	0.032	0.105
79	430.36	574.83	6104.12	0.7773	0.094	0.0306	0.0982	0.732	0.132	0.031	0.105
80	415.52	575.38	6058.47	0.7798	0.0951	0.0296	0.0956	0.735	0.132	0.03	0.102
81	400.68	575.38	6059.29	0.7798	0.0951	0.0295	0.0956	0.735	0.136	0.03	0.099
82	385.84	575.39	6060.1	0.7798	0.0951	0.0295	0.0956	0.735	0.137	0.03	0.098
83	371	575.42	6072.99	0.7798	0.0951	0.029	0.0961	0.738	0.137	0.029	0.097
84	356.16	576.42	5949.01	0.7846	0.0972	0.0281	0.0901	0.7375	0.1385	0.0285	0.096
85	341.32	576.65	5931.79	0.7856	0.0977	0.0276	0.0891	0.737	0.14	0.028	0.095
86	326.48	576.91	5884.11	0.7869	0.0983	0.0276	0.0871	0.735	0.143	0.029	0.093
87	311.64	577.43	5833.55	0.7893	0.0994	0.0266	0.0847	0.741	0.142	0.027	0.09
88	296.8	577.52	5814.73	0.7898	0.0996	0.0266	0.0839	0.74	0.143	0.028	0.089
89	281.96	577.51	5817.58	1000	0	0	0	0.739	0.1435	0.0285	0.0895
90	267.12	577.46	5827.73	0.7894	0.0995	0.0266	0.0845	0.738	0.144	0.029	0.09
91	252.28	577.45	5830.4	0.7894	0.0994	0.0266	0.0846	0.738	0.145	0.027	0.09
92	237.44	579.31	5367.23	0.7998	0.1052	0.0268	0.0682	0.751	0.153	0.029	0.068
93	222.6	579.32	5367.29	0.7998	0.1053	0.0267	0.0682	0.754	0.147	0.03	0.068
94	207.76	579.33	5368.44	0.7999	0.1053	0.0267	0.0682	0.75	0.152	0.028	0.07
95	192.92	579.34	5368.46	0.7999	0.1053	0.0266	0.0682	0.75	0.147	0.031	0.071
96	178.08	579.05	5455.39	0.7982	0.1043	0.0266	0.071	0.746	0.148	0.032	0.075
97	163.24	579.06	5456.23	0.7982	0.1043	0.0266	0.071	0.741	0.151	0.034	0.074
98	148.4	579.34	5369.62	0.7999	0.1053	0.0266	0.0682	0.738	0.164	0.033	0.065
99	133.56	579.18	5419.99	0.7989	0.1047	0.0266	0.0698	0.742	0.148	0.035	0.074
100	118.72	579.07	5451.92	0.7983	0.1043	0.0266	0.0708	0.741	0.147	0.036	0.075
101	103.88	579.07	5452.76	0.7983	0.1043	0.0266	0.0709	0.738	0.147	0.039	0.076
102	89.04	578.89	5505.61	0.7972	0.1037	0.0265	0.0726	0.739	0.146	0.038	0.077
103	74.2	578.8	5530	0.7967	0.1034	0.0265	0.0734	0.736	0.148	0.038	0.078
104	59.36	578.8	5530.73	0.7967	0.1034	0.0265	0.0734	0.736	0.149	0.036	0.079
105	44.52	579.22	5410.72	0.7991	0.1048	0.0266	0.0695	0.7413	0.151	0.034	0.0737
106	29.68	580.17	5415.15	0.7988	0.1068	0.0263	0.0682	0.7465	0.153	0.032	0.0685
107	14.84	580.19	5415.98	1000	0	0	0	0.7517	0.155	0.03	0.0633
108	0	582	5518.09	0.7961	0.1102	0.0256	0.068	0.757	0.157	0.028	0.058
SSFM307-7H G1
No.1	Distance (μm)2	T(°C)3	P(bars)4	Mod Alm5	Mod Prp6	Mod Sps7	Mod Grs8	Obs Alm9	Obs Prp10	Obs Sps11	Obs Grs12
1	1973.47	554.84	5995.2	0.6782	0.0708	0.1143	0.1367	0.68	0.07	0.114	0.136
2	1953.53	554.61	6012.3	0.6773	0.0704	0.1142	0.1382	0.68	0.068	0.116	0.136
3	1933.6	555	5982.39	1000	0	0	0	0.678	0.069	0.12	0.134
4	1913.66	554.49	6021.69	1000	0	0	0	0.678	0.067	0.118	0.136
5	1893.73	554.49	6021.58	0.6767	0.0702	0.1141	0.139	0.676	0.068	0.119	0.137
6	1873.8	554.5	6022.31	0.6767	0.0702	0.114	0.139	0.675	0.068	0.119	0.137
7	1853.86	554.4	6029.51	0.6763	0.0701	0.114	0.1396	0.675	0.068	0.12	0.138
8	1833.93	554.4	6029.73	0.6763	0.0701	0.114	0.1396	0.674	0.068	0.12	0.138
9	1813.99	554.41	6030.45	0.6763	0.0701	0.1139	0.1397	0.675	0.068	0.119	0.138
10	1794.06	554.52	6021.82	0.6769	0.0702	0.114	0.1389	0.675	0.068	0.119	0.137
11	1774.13	554.52	6022.38	0.6768	0.0702	0.114	0.139	0.676	0.068	0.118	0.137
12	1754.19	554.52	6023.13	0.6768	0.0702	0.1139	0.139	0.679	0.067	0.115	0.138
13	1734.26	554.52	6023.85	0.6768	0.0702	0.1139	0.139	0.679	0.067	0.115	0.139
14	1714.32	554.01	6060.56	0.6746	0.0694	0.1137	0.1423	0.679	0.067	0.114	0.14
15	1694.39	553.99	6063.05	0.6745	0.0694	0.1136	0.1425	0.678	0.067	0.114	0.14
16	1674.46	553.88	6071.82	0.674	0.0692	0.1135	0.1433	0.678	0.067	0.113	0.141
17	1654.52	553.73	6082.26	1000	0	0	0	0.678	0.067	0.113	0.142
18	1634.59	553.35	6108.42	0.6717	0.0684	0.1133	0.1466	0.677	0.066	0.113	0.144
19	1614.65	554.1	6098.75	0.6751	0.0692	0.1113	0.1443	0.678	0.068	0.111	0.143
20	1594.72	553.74	6124.36	0.6735	0.0687	0.1112	0.1466	0.675	0.068	0.111	0.146
21	1574.79	554.17	6118.05	0.6755	0.0692	0.1101	0.1452	0.676	0.069	0.11	0.145
22	1554.85	554.02	6140.95	0.6749	0.0689	0.1093	0.1469	0.678	0.068	0.109	0.146
23	1534.92	554.14	6164.46	0.6756	0.0688	0.1076	0.148	0.679	0.067	0.107	0.146
24	1514.98	554.88	6157.94	0.679	0.0697	0.1055	0.1458	0.683	0.068	0.105	0.144
25	1495.05	554.92	6157.13	0.6792	0.0697	0.1054	0.1457	0.683	0.067	0.108	0.142
26	1475.12	556.31	6170.34	0.6857	0.0712	0.1	0.1431	0.686	0.071	0.1	0.143
27	1455.18	556.18	6179.61	0.6852	0.071	0.1	0.1439	0.685	0.071	0.1	0.144
28	1435.25	556.09	6185.98	0.6848	0.0708	0.0999	0.1445	0.685	0.071	0.101	0.145
29	1415.31	556.1	6186.75	0.6848	0.0708	0.0999	0.1445	0.684	0.071	0.101	0.145
30	1395.38	555.83	6204.84	0.6836	0.0704	0.0998	0.1462	0.685	0.069	0.1	0.145
31	1375.45	554.92	6292.36	0.6797	0.0688	0.0978	0.1537	0.68	0.069	0.098	0.154
32	1355.51	555.7	6245.69	0.6831	0.0699	0.098	0.1489	0.683	0.07	0.098	0.149
33	1335.58	555.7	6246.52	0.6832	0.0699	0.0979	0.149	0.682	0.07	0.099	0.15
34	1315.64	555.08	6316.43	0.6805	0.0688	0.096	0.1548	0.68	0.069	0.096	0.155
35	1295.71	555.61	6327.49	0.6831	0.0693	0.0936	0.154	0.681	0.071	0.094	0.156
36	1275.78	556.39	6340.2	0.6867	0.07	0.0904	0.1528	0.681	0.073	0.091	0.156
37	1255.84	556.4	6339.38	0.6868	0.0701	0.0904	0.1527	0.682	0.072	0.092	0.155
38	1235.91	556.44	6337.58	0.6869	0.0701	0.0904	0.1525	0.682	0.071	0.093	0.153
39	1215.97	556.88	6309.91	0.6889	0.0708	0.0905	0.1498	0.686	0.071	0.093	0.15
40	1196.04	556.5	6347.24	0.6873	0.0701	0.0897	0.153	0.683	0.072	0.09	0.155
41	1176.11	557.52	6281.35	1000	0	0	0	0.687	0.073	0.092	0.148
42	1156.17	557.86	6261.58	0.6933	0.0723	0.0899	0.1445	0.692	0.071	0.093	0.143
43	1136.24	556.82	6348.82	0.6888	0.0705	0.0885	0.1522	0.684	0.073	0.089	0.155
44	1116.3	556.58	6363.73	0.6877	0.0701	0.0885	0.1537	0.684	0.072	0.09	0.156
45	1096.37	556.58	6364.55	0.6877	0.0701	0.0884	0.1538	0.683	0.071	0.091	0.156
46	1076.44	555.43	6435.3	0.6826	0.0683	0.0879	0.1612	0.676	0.071	0.092	0.161
47	1056.5	556.53	6370.74	0.6875	0.07	0.0882	0.1543	0.681	0.07	0.094	0.155
48	1036.57	556.53	6371.51	0.6875	0.07	0.0882	0.1543	0.673	0.07	0.093	0.163
49	1016.63	556.54	6372.28	0.6875	0.07	0.0881	0.1544	0.675	0.07	0.093	0.163
50	996.7	556.54	6373.12	0.6876	0.07	0.088	0.1544	0.676	0.069	0.093	0.163
51	976.766	556.54	6373.89	0.6876	0.07	0.088	0.1545	0.678	0.069	0.092	0.162
52	956.832	556.55	6374.73	0.6876	0.07	0.0879	0.1545	0.679	0.068	0.092	0.162
53	936.898	555.77	6420.46	1000	0	0	0	0.678	0.071	0.089	0.162
54	916.964	555.06	6460.68	0.681	0.0677	0.0875	0.1638	0.675	0.07	0.09	0.167
55	897.03	554.13	6509.68	1000	0	0	0	0.671	0.068	0.09	0.172
56	877.096	554.11	6516.26	0.6767	0.0663	0.0869	0.1701	0.674	0.067	0.087	0.171
57	857.162	555.21	6500.22	0.6818	0.0676	0.0846	0.1659	0.675	0.07	0.085	0.169
58	837.228	555.41	6493.69	0.6827	0.0679	0.0844	0.165	0.676	0.071	0.085	0.169
59	817.294	555.66	6496.17	0.6839	0.0681	0.0835	0.1644	0.676	0.071	0.084	0.168
60	797.36	556.07	6476.76	0.6857	0.0687	0.0835	0.1621	0.677	0.072	0.084	0.166
61	777.426	556.19	6471.96	0.6863	0.0689	0.0834	0.1614	0.679	0.072	0.084	0.165
62	757.492	556.6	6450.18	0.6881	0.0695	0.0834	0.159	0.68	0.073	0.084	0.163
63	737.558	557.91	6467.4	0.6943	0.0709	0.0783	0.1565	0.683	0.076	0.079	0.162
64	717.624	559.38	6437.52	0.701	0.0727	0.0753	0.151	0.69	0.078	0.076	0.156
65	697.69	560.51	6462.58	0.7063	0.0739	0.0703	0.1496	0.692	0.081	0.071	0.156
66	677.756	561.7	6465.59	0.7117	0.0753	0.0663	0.1468	0.695	0.084	0.067	0.154
67	657.822	563.51	6424.89	0.7199	0.0777	0.0623	0.1401	0.704	0.087	0.063	0.147
68	637.888	565.57	6380.22	0.7291	0.0806	0.0574	0.1329	0.712	0.09	0.058	0.139
69	617.954	567.1	6328.1	0.7359	0.0828	0.0544	0.1269	0.717	0.094	0.055	0.133
70	598.02	568.86	6274.56	0.7436	0.0855	0.0504	0.1205	0.723	0.099	0.051	0.127
71	578.086	569.91	6253.66	0.7481	0.087	0.0475	0.1174	0.726	0.102	0.048	0.124
72	558.152	569.9	6373.31	0.7482	0.0862	0.0425	0.1231	0.723	0.103	0.043	0.131
73	538.218	572.42	6193.56	0.7588	0.0908	0.0406	0.1098	0.735	0.108	0.041	0.116
74	518.284	574.09	6103.79	0.7657	0.0937	0.0376	0.1029	0.739	0.114	0.038	0.109
75	498.35	575.3	5995.26	0.7707	0.0962	0.0366	0.0965	0.742	0.118	0.037	0.102
76	478.416	576.65	5888.66	0.7761	0.0989	0.0346	0.0903	0.749	0.12	0.035	0.095
77	458.482	577.31	5832.65	0.7788	0.1003	0.0336	0.0873	0.75	0.124	0.034	0.092
78	438.548	578.86	5714.93	0.7848	0.1035	0.0307	0.081	0.757	0.127	0.031	0.085
79	418.614	579.58	5598.22	0.7877	0.1055	0.0307	0.0762	0.758	0.131	0.031	0.08
80	398.68	580.23	5569.12	0.7901	0.1067	0.0287	0.0744	0.761	0.132	0.029	0.078
81	378.746	579.62	5677.38	1000	0	0	0	0.756	0.133	0.029	0.083
82	358.812	579.16	5788.52	0.7859	0.1034	0.0277	0.083	0.751	0.134	0.028	0.088
83	338.878	580.44	5710.41	0.7906	0.106	0.0248	0.0786	0.756	0.136	0.025	0.083
84	318.944	579.93	5794.85	0.7886	0.1046	0.0247	0.0821	0.753	0.135	0.025	0.087
85	299.01	580.87	5729.08	0.792	0.1065	0.0228	0.0786	0.758	0.136	0.023	0.083
86	279.076	580.4	5844.54	0.7901	0.105	0.0218	0.0831	0.754	0.135	0.022	0.088
87	259.142	580.01	5902.69	0.7886	0.104	0.0218	0.0857	0.752	0.136	0.022	0.091
88	239.208	579.97	5947.3	0.7883	0.1036	0.0208	0.0873	0.75	0.137	0.021	0.093
89	219.274	580.76	5875.94	0.7912	0.1053	0.0198	0.0836	0.751	0.14	0.02	0.089
90	199.34	580.76	5876.72	0.7912	0.1053	0.0198	0.0837	0.753	0.14	0.023	0.085
91	179.406	580.76	5877.49	0.7912	0.1053	0.0198	0.0837	0.75	0.14	0.024	0.087
92	159.472	580.86	5863.13	1000	0	0	0	0.747	0.139	0.024	0.089
93	139.538	580.81	5871.3	0.7914	0.1054	0.0198	0.0834	0.741	0.143	0.027	0.09
94	119.604	580.81	5872.07	0.7914	0.1054	0.0197	0.0834	0.735	0.146	0.03	0.09
95	99.67	580.81	5872.84	0.7914	0.1054	0.0197	0.0835	0.735	0.144	0.032	0.09
96	79.736	580.81	5873.61	0.7914	0.1054	0.0197	0.0835	0.734	0.142	0.034	0.09
97	59.802	582.16	5650.67	0.7966	0.1092	0.0198	0.0744	0.742	0.146	0.032	0.08
98	39.868	582.45	5595.52	0.7977	0.1101	0.0199	0.0723	0.75	0.15	0.031	0.069
99	19.934	593.81	5673.24	0.7915	0.1339	0.0178	0.0568	0.758	0.154	0.029	0.059
100	0	593.81	5674.01	0.7915	0.1339	0.0178	0.0568	0.761	0.152	0.028	0.06
SSFM307-7H G5
No.1	Distance (μm)2	T(°C)3	P(bars)4	Mod Alm5	Mod Prp6	Mod Sps7	Mod Grs8	Obs Alm9	Obs Prp10	Obs Sps11	Obs Grs12
1	2622	551.5	5879.81	0.6622	0.068	0.1315	0.1383	0.653	0.072	0.133	0.142
2	2648.48	551.32	5896.05	0.6614	0.0677	0.1313	0.1397	0.65	0.072	0.135	0.144
3	2674.97	551.32	5896.89	0.6614	0.0677	0.1312	0.1397	0.646	0.071	0.137	0.146
4	2701.45	551.19	5907.62	0.6609	0.0674	0.1311	0.1406	0.651	0.071	0.133	0.144
5	2727.93	551.19	5908.33	0.6609	0.0674	0.131	0.1406	0.647	0.07	0.135	0.147
6	2754.42	551.21	5907.12	1000	0	0	0	0.65	0.071	0.135	0.144
7	2780.9	551.45	5889.24	1000	0	0	0	0.652	0.071	0.134	0.142
8	2807.38	551.91	5853.55	1000	0	0	0	0.655	0.072	0.134	0.139
9	2833.86	552.76	5789.2	0.6679	0.0699	0.1316	0.1306	0.661	0.073	0.133	0.133
10	2860.35	553.35	5738.96	0.6705	0.0709	0.1319	0.1267	0.663	0.074	0.134	0.129
11	2886.83	553.36	5739.79	0.6705	0.0709	0.1318	0.1267	0.663	0.074	0.134	0.129
12	2913.31	553.01	5770.38	0.669	0.0704	0.1316	0.129	0.66	0.074	0.134	0.132
13	2939.8	553.02	5769.07	1000	0	0	0	0.663	0.073	0.133	0.131
14	2966.28	552.77	5818.92	0.668	0.0697	0.1301	0.1321	0.66	0.074	0.134	0.133
15	2992.76	552.87	5810.44	0.6684	0.0699	0.1302	0.1315	0.659	0.073	0.134	0.134
16	3019.25	552.88	5811.27	0.6685	0.0699	0.1301	0.1315	0.658	0.073	0.134	0.134
17	3045.73	552.51	5861.34	0.6669	0.0692	0.1289	0.135	0.661	0.073	0.132	0.135
18	3072.21	552.58	5855.46	0.6672	0.0693	0.129	0.1345	0.654	0.072	0.137	0.137
19	3098.69	552.49	5863.52	0.6668	0.0691	0.1289	0.1352	0.656	0.072	0.134	0.138
20	3125.18	552.7	5846.76	1000	0	0	0	0.657	0.073	0.134	0.137
21	3151.66	552.34	5874.68	1000	0	0	0	0.662	0.071	0.13	0.138
22	3178.14	553.3	5866.37	0.6706	0.07	0.1259	0.1335	0.665	0.073	0.127	0.136
23	3204.63	552.91	5904.77	0.6689	0.0693	0.1253	0.1365	0.665	0.071	0.126	0.138
24	3231.11	553.12	5933.33	0.67	0.0693	0.1231	0.1376	0.663	0.072	0.124	0.14
25	3257.59	553.85	5956.37	0.6735	0.07	0.1194	0.1372	0.668	0.072	0.12	0.139
26	3284.08	553.94	5977.58	0.674	0.0699	0.118	0.1382	0.668	0.073	0.119	0.141
27	3310.56	555.54	6003.76	0.6815	0.0715	0.1111	0.136	0.674	0.075	0.112	0.139
28	3337.04	556.37	6000.22	0.6854	0.0724	0.1083	0.1339	0.68	0.075	0.109	0.136
29	3363.52	555.92	6114.81	0.6837	0.0711	0.104	0.1413	0.68	0.075	0.105	0.145
30	3390.01	556.64	6156.88	0.6872	0.0716	0.0993	0.1419	0.68	0.075	0.1	0.145
31	3416.49	556.53	6168.85	0.6867	0.0714	0.099	0.1429	0.677	0.076	0.1	0.147
32	3442.97	557.35	6162.67	0.6905	0.0723	0.0965	0.1406	0.676	0.08	0.098	0.147
33	3469.46	559.1	6126.69	0.6986	0.0746	0.0922	0.1346	0.69	0.079	0.093	0.138
34	3495.94	558.43	6177.48	0.6956	0.0735	0.092	0.1389	0.683	0.076	0.098	0.142
35	3522.42	558.45	6176.7	0.6957	0.0735	0.092	0.1388	0.685	0.078	0.096	0.141
36	3548.91	558.27	6190.2	1000	0	0	0	0.68	0.079	0.096	0.145
37	3575.39	558.02	6222.85	0.6939	0.0727	0.0911	0.1424	0.683	0.078	0.092	0.147
38	3601.87	557.87	6286.85	0.6934	0.0721	0.0881	0.1464	0.684	0.077	0.089	0.151
39	3628.35	558.88	6216.43	0.6979	0.0737	0.0884	0.14	0.681	0.078	0.095	0.147
40	3654.84	558.45	6247.6	0.696	0.073	0.0883	0.1428	0.683	0.079	0.09	0.148
41	3681.32	558.8	6223.43	0.6975	0.0736	0.0884	0.1406	0.684	0.08	0.09	0.146
42	3707.8	558.87	6247.95	0.6979	0.0735	0.0868	0.1418	0.684	0.081	0.088	0.148
43	3734.29	559.03	6273.16	0.6988	0.0735	0.0849	0.1428	0.684	0.081	0.086	0.149
44	3760.77	559.22	6300.62	0.6997	0.0735	0.0829	0.1439	0.684	0.082	0.084	0.151
45	3787.25	559.41	6325.47	0.7007	0.0735	0.0809	0.1449	0.684	0.082	0.082	0.152
46	3813.74	559.35	6341.5	0.7005	0.0733	0.0802	0.1459	0.688	0.079	0.081	0.151
47	3840.22	558.99	6366.45	0.6989	0.0728	0.0801	0.1483	0.686	0.079	0.081	0.154
48	3866.7	558.76	6395.44	0.6979	0.0723	0.0792	0.1505	0.685	0.078	0.08	0.156
49	3893.18	558.37	6419.56	1000	0	0	0	0.683	0.078	0.08	0.159
50	3919.67	559.26	6365.61	0.7001	0.0731	0.0792	0.1476	0.689	0.079	0.08	0.153
51	3946.15	560.29	6316.37	0.7047	0.0746	0.0784	0.1422	0.695	0.079	0.079	0.146
52	3972.63	560.43	6325.18	0.7054	0.0747	0.0775	0.1424	0.696	0.079	0.078	0.146
53	3999.12	561.17	6299.17	0.7088	0.0758	0.0763	0.1392	0.696	0.082	0.077	0.144
54	4025.6	560.27	6416.05	0.705	0.0739	0.0732	0.148	0.689	0.082	0.074	0.155
55	4052.08	560.31	6423.81	0.7052	0.0739	0.0726	0.1483	0.685	0.081	0.074	0.16
56	4078.57	560.45	6421.95	0.7058	0.0741	0.0722	0.1479	0.692	0.081	0.073	0.154
57	4105.05	560.58	6432.84	0.7065	0.0741	0.0712	0.1482	0.691	0.082	0.072	0.155
58	4131.53	559.82	6513.96	0.7032	0.0727	0.0692	0.1549	0.687	0.081	0.07	0.163
59	4158.01	560.08	6518.34	0.7044	0.0729	0.0682	0.1545	0.687	0.082	0.069	0.163
60	4184.5	560.36	6521.1	0.7057	0.0733	0.0671	0.1539	0.688	0.083	0.068	0.163
61	4210.98	560.78	6531.73	0.7077	0.0737	0.0652	0.1535	0.688	0.083	0.066	0.162
62	4237.46	561.03	6535.59	0.7088	0.0739	0.0642	0.153	0.688	0.084	0.065	0.162
63	4263.95	561.92	6500.87	0.7128	0.0752	0.0632	0.1487	0.695	0.085	0.064	0.157
64	4290.43	562.81	6461.98	0.7168	0.0766	0.0624	0.1443	0.701	0.085	0.063	0.151
65	4316.91	565.34	6390.8	0.7281	0.0802	0.0573	0.1344	0.709	0.092	0.058	0.142
66	4343.4	569.42	6428.5	0.7461	0.0851	0.0416	0.1272	0.725	0.098	0.042	0.134
67	4369.88	572.1	6399.48	0.7573	0.089	0.0337	0.12	0.734	0.105	0.034	0.127
68	4396.36	573.63	6450.24	0.7633	0.0908	0.0268	0.1192	0.739	0.107	0.027	0.126
69	4422.84	573.93	6561.91	0.764	0.0905	0.0218	0.1237	0.735	0.11	0.022	0.132
70	4449.33	575.22	6509.72	0.769	0.0927	0.0198	0.1185	0.742	0.112	0.02	0.126
71	4475.81	576.84	6423.19	0.7752	0.0957	0.0179	0.1113	0.749	0.116	0.018	0.118
72	4502.29	577.11	6499.7	0.7754	0.0957	0.0149	0.114	0.743	0.12	0.015	0.122
73	4528.78	579.52	6292.33	0.7847	0.1007	0.0139	0.1007	0.753	0.126	0.014	0.107
74	4555.26	579.92	6288.35	0.7859	0.1014	0.0129	0.0998	0.753	0.127	0.013	0.106
75	4581.74	580.24	6295.68	0.7867	0.1019	0.0119	0.0994	0.752	0.13	0.012	0.106
76	4608.23	580.68	6291.22	0.7879	0.1027	0.0109	0.0985	0.751	0.132	0.011	0.105
77	4634.71	580.85	6272.14	0.7886	0.1031	0.0109	0.0974	0.75	0.134	0.011	0.104
78	4661.19	580.85	6272.97	0.7886	0.1031	0.0109	0.0975	0.749	0.136	0.011	0.103
79	4687.67	580.85	6273.81	0.7886	0.1031	0.0109	0.0975	0.749	0.138	0.012	0.102
80	4714.16	580.85	6274.64	0.7886	0.1031	0.0109	0.0975	0.748	0.139	0.012	0.1
81	4740.64	580.85	6275.47	0.7886	0.1031	0.0108	0.0975	0.747	0.141	0.012	0.099
82	4767.12	581.87	6149.48	0.7925	0.1055	0.0109	0.0911	0.746	0.143	0.012	0.098
83	4793.61	581.88	6150.29	0.7925	0.1055	0.0108	0.0911	0.748	0.142	0.014	0.096
84	4820.09	581.88	6151.11	0.7925	0.1055	0.0108	0.0912	0.745	0.144	0.016	0.094
85	4846.57	581.88	6151.93	0.7925	0.1055	0.0108	0.0912	0.744	0.14	0.017	0.098
86	4873.06	581.88	6152.74	0.7925	0.1055	0.0108	0.0912	0.751	0.145	0.021	0.083
87	4899.54	584.49	5759.39	0.8022	0.1126	0.0109	0.0743	0.758	0.15	0.025	0.067
88	4926.02	588.11	5957.36	0.7985	0.1197	0.0096	0.0723	0.757	0.151	0.025	0.067
89	4952.5	588.09	5958.16	0.7986	0.1196	0.0093	0.0724	0.758	0.147	0.029	0.066
90	4978.99	593.54	6206.38	1000	0	0	0	0.752	0.146	0.034	0.068
91	5005.47	595.29	6223.37	0.7915	0.1351	0.0086	0.0647	0.745	0.143	0.037	0.074
92	5031.95	592.19	6194.14	0.7902	0.1283	0.0088	0.0726	0.743	0.144	0.039	0.073
93	5058.44	592.19	6194.14	0.7902	0.1283	0.0088	0.0726	0.746	0.142	0.041	0.071
94	5084.92	597.2	5660.28	0.7974	0.14	0.0086	0.054	0.756	0.147	0.042	0.055
95	5111.4	597.2	5661.05	0.7973	0.14	0.0086	0.054	0.755	0.147	0.042	0.058
96	5137.89	596.38	5940.79	0.7946	0.1377	0.0086	0.0591	0.753	0.146	0.041	0.06
97	5164.37	596.1	6020.35	1000	0	0	0	0.751	0.149	0.038	0.062
98	5190.85	595.17	6224.45	0.7915	0.1348	0.0085	0.0651	0.75	0.152	0.035	0.064
99	5217.33	595.08	6223.41	1000	0	0	0	0.748	0.155	0.032	0.065
100	5243.82	595.46	6189.7	0.792	0.1355	0.0085	0.064	0.746	0.158	0.029	0.067
SSFM307-8D G2
No.1	Distance (μm)2	T(°C)3	P(bars)4	Mod Alm5	Mod Prp6	Mod Sps7	Mod Grs8	Obs Alm9	Obs Prp10	Obs Sps11	Obs Grs12
1	765	543.795	5000.81	0.751668	0.0541771	0.0534563	0.140699	0.723	0.067	0.054	0.156
2	780.6	543.897	5010.17	0.752381	0.0541842	0.0524609	0.140974	0.723	0.067	0.053	0.157
3	796.2	544.316	5049.41	0.755334	0.0542065	0.0483198	0.142139	0.711	0.066	0.049	0.174
4	811.8	543.396	5288.97	0.753484	0.0521684	0.0419497	0.152398	0.728	0.067	0.053	0.151
5	827.4	544.615	5060.44	0.759647	0.0539762	0.043391	0.142986	0.738	0.069	0.053	0.139
6	843	544.615	5060.44	0.759647	0.0539762	0.043391	0.142986	0.73	0.067	0.054	0.149
7	858.6	543.733	5298.25	0.754922	0.0524145	0.040365	0.152298	0.729	0.066	0.055	0.15
8	874.2	544.334	5143	0.759679	0.053216	0.0405338	0.146571	0.73	0.066	0.057	0.147
9	889.8	544.335	5143.82	0.759674	0.0532152	0.0405151	0.146596	0.724	0.065	0.054	0.157
10	905.4	543.451	5375.97	0.75268	0.0520365	0.0400651	0.155219	0.72	0.067	0.055	0.158
11	921	544.379	5144.18	0.75987	0.05325	0.0403244	0.146555	0.725	0.065	0.053	0.156
12	936.6	544.38	5145	0.759865	0.0532493	0.0403059	0.14658	0.723	0.065	0.054	0.158
13	952.2	544.381	5145.83	0.75986	0.0532486	0.0402872	0.146605	0.723	0.065	0.054	0.159
14	967.8	544.383	5146.65	0.759854	0.0532478	0.0402686	0.146629	0.722	0.065	0.053	0.16
15	983.4	544.384	5147.48	0.759849	0.0532471	0.04025	0.146654	0.727	0.066	0.053	0.154
16	999	544.385	5148.3	0.759844	0.0532463	0.0402314	0.146679	0.732	0.067	0.053	0.149
17	1014.6	544.387	5149.13	0.759838	0.0532456	0.0402128	0.146703	0.737	0.068	0.053	0.143
18	1030.2	544.388	5149.95	0.759833	0.0532449	0.0401941	0.146728	0.724	0.066	0.053	0.157
19	1045.8	544.389	5150.78	0.759828	0.0532441	0.0401755	0.146753	0.724	0.067	0.054	0.155
20	1061.4	543.492	5383	0.752782	0.0520558	0.0397601	0.155402	0.725	0.066	0.052	0.156
21	1077	543.498	5382.18	0.752818	0.0520618	0.039753	0.155368	0.721	0.066	0.055	0.158
22	1092.6	544.45	5146.22	0.760167	0.0533031	0.0399932	0.146536	0.729	0.066	0.054	0.15
23	1108.2	544.451	5147.05	0.760162	0.0533024	0.0399747	0.146561	0.734	0.068	0.051	0.147
24	1123.8	543.567	5379.34	0.753165	0.0521222	0.0395262	0.155187	0.726	0.066	0.049	0.159
25	1139.4	543.573	5378.53	0.7532	0.0521282	0.0395192	0.155153	0.729	0.067	0.043	0.161
26	1155	544.056	5393.35	0.75517	0.0524903	0.0373065	0.155034	0.729	0.067	0.038	0.167
27	1170.6	543.421	5658.75	0.749179	0.0515053	0.0344052	0.16491	0.72	0.066	0.035	0.179
28	1186.2	543.98	5744.63	0.750512	0.0518322	0.0305333	0.167122	0.725	0.064	0.031	0.18
29	1201.8	545.878	5492.93	0.761657	0.053849	0.028575	0.155919	0.737	0.067	0.029	0.167
30	1217.4	546.305	5740.44	0.759894	0.053866	0.0226897	0.163551	0.734	0.067	0.023	0.176
31	1233	546.493	5816.59	0.759481	0.0539487	0.0207381	0.165832	0.735	0.066	0.021	0.178
32	1248.6	548.164	5695.17	0.767358	0.055687	0.0177854	0.15917	0.744	0.068	0.018	0.17
33	1264.2	549.415	5661.96	0.772063	0.056996	0.0148485	0.156093	0.75	0.07	0.015	0.164
34	1279.8	547.378	6081.8	0.758222	0.0545946	0.0138418	0.173341	0.732	0.067	0.014	0.187
35	1295.4	548.426	6131.67	0.760374	0.0556798	0.0108913	0.173055	0.733	0.068	0.011	0.188
36	1311	548.987	6046.09	0.763638	0.0563021	0.0108813	0.169179	0.738	0.069	0.011	0.182
37	1326.6	551.229	5937.25	0.771715	0.0588582	0.00793629	0.161491	0.764	0.075	0.008	0.153
38	1342.2	551.233	5938.09	0.771707	0.0588628	0.00792137	0.161509	0.773	0.082	0.008	0.137
39	1357.8	552.319	6116.89	0.769966	0.0602115	0.00497209	0.164851	0.768	0.083	0.005	0.143
40	1373.4	550.596	6398.47	0.759651	0.0582568	0.00480189	0.177291	0.759	0.082	0.005	0.153
41	1389	552.386	6129.44	0.769793	0.0603013	0.00481113	0.165095	0.772	0.086	0.005	0.137
42	1404.6	552.39	6129.5	0.769798	0.0603058	0.00480681	0.165089	0.789	0.092	0.005	0.114
43	1420.2	551.297	5917.55	0.775761	0.0584261	0.00403013	0.161783	0.785	0.095	0.004	0.117
44	1435.8	552.837	5607.34	0.78003	0.0600801	0.00298537	0.156905	0.793	0.098	0.003	0.106
45	1451.4	552.838	5608.09	0.780044	0.0600783	0.00295642	0.156921	0.789	0.097	0.004	0.11
46	1467	552.871	5610.47	0.780039	0.0601147	0.00287831	0.156968	0.777	0.094	0.003	0.126
47	1482.6	552.869	5611.61	0.78004	0.0601098	0.00286054	0.156989	0.785	0.098	0.003	0.114
48	1498.2	552.87	5612.37	0.780031	0.0601113	0.00285633	0.157002	0.787	0.099	0.003	0.11
49	1513.8	552.87	5614.93	0.779998	0.0601128	0.00284626	0.157043	0.807	0.095	0.003	0.095
50	1529.4	552.871	5615.69	0.779988	0.0601143	0.00284211	0.157056	0.813	0.098	0.004	0.086
