# Supplementary material
Source: publisher figshare collection journal article supplement (https://gsapubs.figshare.com/articles/dataset/_/12541781)
Supplement: Supplementary file 1 [file 1]

Craddock Affinati, S., Hoisch, T.D., Wells, M.L., and Vervoort, J.D., 2019, Pressure-temperature-time paths from the Funeral Mountains, California, reveal Jurassic retroarc underthrusting during early Sevier orogenesis: GSA Bulletin, <https://doi.org/10.1130/B35095.1>.

## **Data Repository**

Table DR1. Locations of samples analyzed.

Table DR2. Mineral compositions, mineral modes and calculated bulk compositions used for P-T path modeling.

Table DR3. Output files produced by the modeling of P-T paths using the method of Moynihan and Pattison (2013).

**Table DR1. Locations of samples analyzed**

| <b>Sample</b>      | <b>Easting</b> | <b>Northing</b> |
|--------------------|----------------|-----------------|
| <b>SCFM315-17A</b> | 511401         | 4060918         |
| <b>SCFM315-12C</b> | 511835         | 4060717         |
| <b>SCFM314-1MW</b> | 510683         | 4061819         |
| <b>SCFM315-16B</b> | 511030         | 4600595         |
| <b>SSFM307-7G</b>  | 511172         | 4061138         |
| <b>SSFM307-7H</b>  | 511172         | 4061138         |
| <b>SSFM307-8C</b>  | 513736         | 4057569         |
|                    |                |                 |
| <b>UTM Zone</b>    | 11S            |                 |
| <b>Datum</b>       | NAD83          |                 |

Table DR2. Mineral compositions, mineral modes and calculated bulk compositions used for *P-T* path modeling

| SCFM314-1MW                   |                      |        |                                |                  |       |                  |        |                  |       |                            |                    |       |        |       |       |                 |       |       |       |                        |                                 |
|-------------------------------|----------------------|--------|--------------------------------|------------------|-------|------------------|--------|------------------|-------|----------------------------|--------------------|-------|--------|-------|-------|-----------------|-------|-------|-------|------------------------|---------------------------------|
|                               | Weight Percent Oxide |        |                                |                  |       |                  |        |                  |       | Normalization <sup>1</sup> | Normalized Formula |       |        |       |       |                 |       |       |       | Mineral Modes Used (%) | Point counted Mineral Modes (%) |
|                               | Na <sub>2</sub> O    | MgO    | Al <sub>2</sub> O <sub>3</sub> | K <sub>2</sub> O | CaO   | TiO <sub>2</sub> | FeO    | SiO <sub>2</sub> | MnO   |                            | Na                 | Mg    | Al     | K     | Ca    | Ti <sup>2</sup> | Fe    | Si    | Mn    |                        |                                 |
| Plagioclase                   | 6.920                | 0.017  | 26.528                         | 0.057            | 7.638 | 0.003            | 0.070  | 58.293           | 0.000 | 8                          | 0.601              | 0.001 | 1.401  | 0.003 | 0.367 | 0.000           | 0.005 | 2.612 | 0.000 | 5.657                  | 5.657                           |
| Muscovite                     | 1.216                | 0.622  | 35.459                         | 9.438            | 0.023 | 0.342            | 1.048  | 45.295           | 0.013 | 11                         | 0.132              | 0.063 | 2.827  | 0.809 | 0.002 | 0.017           | 0.059 | 3.064 | 0.001 | 30.303                 | 30.303                          |
| Biotite                       | 0.360                | 11.295 | 18.895                         | 8.345            | 0.015 | 1.740            | 18.005 | 37.145           | 0.030 | 11                         | 0.043              | 1.253 | 1.657  | 0.787 | 0.001 | 0.097           | 1.120 | 2.764 | 0.002 | 4.242                  | 13.737                          |
| Quartz                        | 0.000                | 0.000  | 0.000                          | 0.000            | 0.000 | 0.000            | 0.000  | 100.000          | 0.000 | 2                          | 0.000              | 0.000 | 0.000  | 0.000 | 0.000 | 0.000           | 0.000 | 1.000 | 0.000 | 29.495                 | 29.495                          |
| Garnet                        | 0.000                | 2.261  | 20.651                         | 0.000            | 3.778 | 0.000            | 32.707 | 36.596           | 3.951 | 12                         | 0.000              | 0.306 | 2.000  | 0.000 | 0.353 | 0.000           | 2.268 | 3.000 | 0.073 | 2.626                  | 2.626                           |
| Staurolite                    | 0.026                | 1.578  | 55.297                         | 0.005            | 0.004 | 0.461            | 12.612 | 27.735           | 0.048 | 46                         | 0.014              | 0.648 | 17.964 | 0.002 | 0.001 | 0.096           | 2.907 | 7.644 | 0.011 | 12.525                 | 12.525                          |
| Chlorite                      | 0.003                | 16.316 | 23.439                         | 0.023            | 0.016 | 0.071            | 21.241 | 24.615           | 0.030 | 14                         | 0.000              | 2.562 | 2.910  | 0.003 | 0.002 | 0.006           | 1.871 | 2.593 | 0.003 | 15.152                 | 5.657                           |
| Bulk Composition <sup>3</sup> | 0.734                | 3.458  | 25.643                         | 3.140            | 0.553 | 0.259            | 7.498  | 54.041           | 0.057 | 10                         | 0.140              | 0.506 | 2.970  | 0.394 | 0.058 | 0.000           | 0.616 | 5.311 | 0.005 |                        |                                 |
| G1 Core <sup>4</sup>          | 0.000                | 0.933  | 29.145                         | 0.000            | 1.619 | 0.000            | 15.136 | 51.525           | 1.642 |                            | 0.000              | 0.081 | 2.000  | 0.000 | 0.101 | 0.000           | 0.737 | 3.000 | 0.081 |                        |                                 |
| G3 Core <sup>4</sup>          | 0.000                | 0.934  | 29.163                         | 0.000            | 1.845 | 0.000            | 15.083 | 51.556           | 1.420 |                            | 0.000              | 0.081 | 2.000  | 0.000 | 0.115 | 0.000           | 0.734 | 3.000 | 0.070 |                        |                                 |

| SCFM315-12C                   |                      |        |                                |                  |       |                  |        |                  |       |                            |                    |       |        |       |       |                 |       |       |       |                        |                                 |
|-------------------------------|----------------------|--------|--------------------------------|------------------|-------|------------------|--------|------------------|-------|----------------------------|--------------------|-------|--------|-------|-------|-----------------|-------|-------|-------|------------------------|---------------------------------|
|                               | Weight Percent Oxide |        |                                |                  |       |                  |        |                  |       | Normalization <sup>1</sup> | Normalized Formula |       |        |       |       |                 |       |       |       | Mineral Modes Used (%) | Point counted Mineral Modes (%) |
|                               | Na <sub>2</sub> O    | MgO    | Al <sub>2</sub> O <sub>3</sub> | K <sub>2</sub> O | CaO   | TiO <sub>2</sub> | FeO    | SiO <sub>2</sub> | MnO   |                            | Na                 | Mg    | Al     | K     | Ca    | Ti <sup>2</sup> | Fe    | Si    | Mn    |                        |                                 |
| Plagioclase                   | 8.997                | 0.003  | 23.544                         | 0.060            | 4.314 | 0.011            | 0.021  | 62.910           | 0.002 | 8                          | 0.772              | 0.000 | 1.227  | 0.003 | 0.204 | 0.000           | 0.002 | 2.783 | 0.000 | 14.526                 | not altered                     |
| Muscovite                     | 2.136                | 0.365  | 37.002                         | 7.971            | 0.013 | 0.289            | 0.735  | 45.540           | 0.020 | 11                         | 0.229              | 0.036 | 2.910  | 0.674 | 0.000 | 0.014           | 0.041 | 3.038 | 0.001 | 36.421                 |                                 |
| Biotite                       | 0.169                | 10.274 | 19.379                         | 8.083            | 0.198 | 1.517            | 17.485 | 36.077           | 0.000 | 11                         | 0.021              | 1.169 | 1.743  | 0.782 | 0.016 | 0.087           | 1.116 | 2.754 | 0.000 | 4.211                  |                                 |
| Quartz                        | 0.000                | 0.000  | 0.000                          | 0.000            | 0.000 | 0.000            | 0.000  | 100.000          | 0.000 | 2                          | 0.000              | 0.000 | 0.000  | 0.000 | 0.000 | 0.000           | 0.000 | 1.000 | 0.000 | 16.211                 |                                 |
| Garnet                        | 0.000                | 2.141  | 21.052                         | 0.000            | 3.835 | 0.000            | 34.698 | 37.217           | 1.059 | 12                         | 0.000              | 0.257 | 2.000  | 0.000 | 0.331 | 0.000           | 2.339 | 3.000 | 0.072 | 6.947                  |                                 |
| Staurolite                    | 0.003                | 1.724  | 55.763                         | 0.010            | 0.001 | 0.617            | 13.746 | 28.779           | 0.057 | 46                         | 0.002              | 0.690 | 17.660 | 0.003 | 0.000 | 0.125           | 3.089 | 7.733 | 0.013 | 10.105                 |                                 |
| Chlorite                      | 0.006                | 16.327 | 24.278                         | 0.007            | 0.000 | 0.094            | 23.072 | 25.577           | 0.008 | 14                         | 0.001              | 2.472 | 2.906  | 0.001 | 0.000 | 0.007           | 1.959 | 2.597 | 0.001 | 11.579                 |                                 |
| Bulk Composition <sup>3</sup> | 1.893                | 2.805  | 28.928                         | 3.092            | 0.924 | 0.251            | 8.586  | 49.948           | 0.116 | 10                         | 0.353              | 0.402 | 3.275  | 0.379 | 0.095 | 0.000           | 0.690 | 4.798 | 0.009 |                        |                                 |
| G1 Core <sup>4</sup>          | 0.000                | 0.805  | 29.089                         | 0.000            | 1.280 | 0.000            | 15.680 | 51.425           | 1.720 |                            | 0.000              | 0.070 | 2.000  | 0.000 | 0.080 | 0.000           | 0.765 | 3.000 | 0.085 |                        |                                 |
| G3 Core <sup>4</sup>          | 0.000                | 0.805  | 29.095                         | 0.000            | 1.280 | 0.000            | 15.581 | 51.437           | 1.892 |                            | 0.000              | 0.070 | 2.000  | 0.000 | 0.080 | 0.000           | 0.760 | 3.000 | 0.089 |                        |                                 |

| SCFM315-17A                   |                      |        |                                |                  |       |                  |        |                  |       |                            |                    |       |        |       |       |                 |       |       |       |                        |                                 |
|-------------------------------|----------------------|--------|--------------------------------|------------------|-------|------------------|--------|------------------|-------|----------------------------|--------------------|-------|--------|-------|-------|-----------------|-------|-------|-------|------------------------|---------------------------------|
|                               | Weight Percent Oxide |        |                                |                  |       |                  |        |                  |       | Normalization <sup>1</sup> | Normalized Formula |       |        |       |       |                 |       |       |       | Mineral Modes Used (%) | Point counted Mineral Modes (%) |
|                               | Na <sub>2</sub> O    | MgO    | Al <sub>2</sub> O <sub>3</sub> | K <sub>2</sub> O | CaO   | TiO <sub>2</sub> | FeO    | SiO <sub>2</sub> | MnO   |                            | Na                 | Mg    | Al     | K     | Ca    | Ti <sup>2</sup> | Fe    | Si    | Mn    |                        |                                 |
| Plagioclase                   | 8.914                | 0.010  | 23.403                         | 0.079            | 3.988 | 0.000            | 0.021  | 62.858           | 0.000 | 8                          | 0.768              | 0.001 | 1.225  | 0.004 | 0.190 | 0.000           | 0.002 | 2.792 | 0.000 | 26.155                 | 20.204                          |
| Muscovite                     | 2.011                | 0.530  | 36.306                         | 8.091            | 0.005 | 0.419            | 0.861  | 45.210           | 0.009 | 11                         | 0.217              | 0.053 | 2.879  | 0.690 | 0.000 | 0.021           | 0.048 | 3.042 | 0.000 | 6.341                  | 4.898                           |
| Biotite                       | 0.261                | 11.541 | 18.063                         | 8.346            | 1.545 | 1.361            | 15.795 | 34.935           | 0.019 | 11                         | 0.033              | 1.338 | 1.656  | 0.823 | 0.129 | 0.080           | 1.027 | 2.717 | 0.001 | 23.513                 | 18.163                          |
| Quartz                        | 0.000                | 0.000  | 0.000                          | 0.000            | 0.000 | 0.000            | 0.000  | 100.000          | 0.000 | 2                          | 0.000              | 0.000 | 0.000  | 0.000 | 0.000 | 0.000           | 0.000 | 1.000 | 0.000 | 33.816                 | 26.122                          |
| Garnet                        | 0.000                | 3.000  | 21.131                         | 0.000            | 2.760 | 0.000            | 33.711 | 37.357           | 2.043 | 12                         | 0.000              | 0.359 | 2.000  | 0.000 | 0.237 | 0.000           | 2.264 | 3.000 | 0.139 | 3.306                  | 25.306                          |
| Staurolite                    | 0.001                | 1.704  | 55.357                         | 0.011            | 0.001 | 0.624            | 12.600 | 27.819           | 0.095 | 46                         | 0.000              | 0.697 | 17.907 | 0.004 | 0.000 | 0.129           | 2.892 | 7.635 | 0.022 | 6.869                  | 5.306                           |
| Bulk Composition <sup>3</sup> | 2.345                | 3.141  | 18.299                         | 2.564            | 1.472 | 0.414            | 6.633  | 62.291           | 0.111 | 10                         | 0.439              | 0.452 | 2.082  | 0.316 | 0.152 | 0.000           | 0.536 | 6.014 | 0.009 |                        |                                 |
| G3 Core <sup>4</sup>          | 0.000                | 1.304  | 29.192                         | 0.000            | 1.172 | 0.000            | 15.181 | 51.608           | 1.511 |                            | 0.000              | 0.113 | 2.000  | 0.000 | 0.073 | 0.000           | 0.738 | 3.000 | 0.076 |                        |                                 |

| SSFM307-7G                    |                      |        |                                |                  |       |                  |        |                  |       |                            |                    |       |        |       |       |                 |       |       |       |                        |                                 |
|-------------------------------|----------------------|--------|--------------------------------|------------------|-------|------------------|--------|------------------|-------|----------------------------|--------------------|-------|--------|-------|-------|-----------------|-------|-------|-------|------------------------|---------------------------------|
|                               | Weight Percent Oxide |        |                                |                  |       |                  |        |                  |       | Normalization <sup>1</sup> | Normalized Formula |       |        |       |       |                 |       |       |       | Mineral Modes Used (%) | Point counted Mineral Modes (%) |
|                               | Na <sub>2</sub> O    | MgO    | Al <sub>2</sub> O <sub>3</sub> | K <sub>2</sub> O | CaO   | TiO <sub>2</sub> | FeO    | SiO <sub>2</sub> | MnO   |                            | Na                 | Mg    | Al     | K     | Ca    | Ti <sup>2</sup> | Fe    | Si    | Mn    |                        |                                 |
| Plagioclase                   | 9.096                | 0.000  | 23.483                         | 0.112            | 4.184 | 0.093            | 0.118  | 63.779           | 0.065 | 8                          | 0.772              | 0.000 | 1.212  | 0.006 | 0.196 | 0.003           | 0.004 | 2.792 | 0.002 | 27.505                 | 23.153                          |
| Muscovite                     | 2.134                | 0.433  | 36.678                         | 7.977            | 0.085 | 0.665            | 1.169  | 46.400           | 0.139 | 11                         | 0.272              | 0.042 | 2.837  | 0.668 | 0.006 | 0.033           | 0.064 | 3.045 | 0.008 | 7.608                  | 6.404                           |
| Biotite                       | 0.365                | 12.311 | 19.205                         | 8.724            | 0.057 | 1.898            | 16.659 | 36.736           | 0.114 | 11                         | 0.052              | 1.358 | 1.675  | 0.824 | 0.004 | 0.106           | 1.031 | 2.719 | 0.007 | 38.623                 | 32.512                          |
| Quartz                        | 0.000                | 0.000  | 0.000                          | 0.000            | 0.000 | 0.000            | 0.000  | 100.000          | 0.000 | 2                          | 0.000              | 0.000 | 0.000  | 0.000 | 0.000 | 0.000           | 0.000 | 1.000 | 0.000 | 7.900                  | 6.650                           |
| Garnet                        | 0.000                | 3.038  | 21.203                         | 0.000            | 3.881 | 0.000            | 32.254 | 37.483           | 2.142 | 12                         | 0.000              | 0.363 | 2.000  | 0.000 | 0.333 | 0.000           | 2.159 | 3.000 | 0.145 | 5.197                  | 20.197                          |
| Staurolite                    | 0.055                | 1.661  | 54.978                         | 0.050            | 0.057 | 0.804            | 12.970 | 27.924           | 0.203 | 46                         | 0.030              | 0.682 | 17.841 | 0.018 | 0.017 | 0.166           | 2.987 | 7.689 | 0.047 | 10.534                 | 8.867                           |
| Chlorite                      | 0.000                | 1.965  | 49.993                         | 0.000            | 0.000 | 0.711            | 12.738 | 24.129           | 0.079 | 14                         | 0.000              | 0.271 | 5.450  | 0.000 | 0.000 | 0.049           | 0.985 | 2.232 | 0.006 | 2.633                  | 2.217                           |
| Bulk Composition <sup>3</sup> | 2.530                | 5.233  | 25.801                         | 3.963            | 1.337 | 0.922            | 10.827 | 47.120           | 0.252 | 10                         | 0.463              | 0.736 | 2.869  | 0.477 | 0.135 | 0.000           | 0.854 | 4.446 | 0.020 |                        |                                 |
| G1 Core <sup>4</sup>          | 0.000                | 0.726  | 29.164                         | 0.000            | 2.310 | 0.000            | 13.481 | 51.559           | 2.760 |                            | 0.000              | 0.063 | 2.000  | 0.000 | 0.144 | 0.000           | 0.656 | 3.000 | 0.136 |                        |                                 |
| G3 Core <sup>4</sup>          | 0.000                | 0.761  | 29.174                         | 0.000            | 2.439 | 0.000            | 13.979 | 51.576           | 2.070 |                            | 0.000              | 0.066 | 2.000  | 0.000 | 0.152 | 0.000           | 0.680 | 3.000 | 0.102 |                        |                                 |
| G4 Core <sup>4</sup>          | 0.000                | 0.842  | 29.180                         | 0.000            | 2.263 | 0.000            | 13.632 | 51.586           | 2.497 |                            | 0.000              | 0.073 | 2.000  | 0.000 | 0.141 | 0.000           | 0.663 | 3.000 | 0.123 |                        |                                 |
| G5 Core <sup>4</sup>          | 0.000                | 0.727  | 29.172                         | 0.000            | 2.407 | 0.000            | 13.546 | 51.572           | 2.578 |                            | 0.000              | 0.063 | 2.000  | 0.000 | 0.150 | 0.000           | 0.659 | 3.000 | 0.127 |                        |                                 |

| SSFM307-7H                    |                      |        |                                |                  |       |                  |        |                  |       |                            |                    |       |        |       |       |                 |       |       |       |                        |                                 |
|-------------------------------|----------------------|--------|--------------------------------|------------------|-------|------------------|--------|------------------|-------|----------------------------|--------------------|-------|--------|-------|-------|-----------------|-------|-------|-------|------------------------|---------------------------------|
|                               | Weight Percent Oxide |        |                                |                  |       |                  |        |                  |       |                            | Normalized Formula |       |        |       |       |                 |       |       |       |                        |                                 |
|                               | Na <sub>2</sub> O    | MgO    | Al <sub>2</sub> O <sub>3</sub> | K <sub>2</sub> O | CaO   | TiO <sub>2</sub> | FeO    | SiO <sub>2</sub> | MnO   | Normalization <sup>1</sup> | Na                 | Mg    | Al     | K     | Ca    | Ti <sup>2</sup> | Fe    | Si    | Mn    | Mineral Modes Used (%) | Point counted Mineral Modes (%) |
| Plagioclase                   | 8.860                | 0.000  | 23.571                         | 0.060            | 4.768 | 0.000            | 0.000  | 63.180           | 0.003 | 8                          | 0.756              | 0.000 | 1.223  | 0.003 | 0.225 | 0.000           | 0.000 | 2.781 | 0.000 | 18.097                 | 15.211                          |
| Muscovite                     | 2.228                | 0.560  | 36.608                         | 8.427            | 0.005 | 0.393            | 0.795  | 46.478           | 0.004 | 11                         | 0.284              | 0.055 | 2.837  | 0.707 | 0.000 | 0.019           | 0.044 | 3.056 | 0.000 | 9.719                  | 8.169                           |
| Biotite                       | 0.333                | 12.082 | 18.667                         | 9.247            | 0.020 | 1.777            | 16.738 | 36.441           | 0.048 | 11                         | 0.048              | 1.349 | 1.648  | 0.884 | 0.002 | 0.100           | 1.049 | 2.730 | 0.003 | 41.220                 | 34.648                          |
| Quartz                        | 0.000                | 0.000  | 0.000                          | 0.000            | 0.000 | 0.000            | 0.000  | 100.000          | 0.000 | 2                          | 0.000              | 0.000 | 0.000  | 0.000 | 0.000 | 0.000           | 0.000 | 1.000 | 0.000 | 12.735                 | 10.704                          |
| Garnet                        | 0.000                | 2.982  | 21.177                         | 0.000            | 3.605 | 0.000            | 32.636 | 37.437           | 2.165 | 12                         | 0.000              | 0.356 | 2.000  | 0.000 | 0.310 | 0.000           | 2.187 | 3.000 | 0.147 | 12.197                 | 26.197                          |
| Staurolite                    | 0.028                | 1.851  | 55.070                         | 0.000            | 0.002 | 0.643            | 12.852 | 27.969           | 0.062 | 46                         | 0.015              | 0.758 | 17.842 | 0.000 | 0.001 | 0.133           | 2.954 | 7.688 | 0.015 | 1.341                  | 1.127                           |
| Chlorite                      | 0.006                | 17.700 | 22.910                         | 0.000            | 0.024 | 1.124            | 21.217 | 25.012           | 0.057 | 14                         | 0.001              | 2.707 | 2.771  | 0.000 | 0.003 | 0.087           | 1.821 | 2.567 | 0.005 | 4.692                  | 3.944                           |
| Bulk Composition <sup>3</sup> | 1.756                | 6.295  | 20.227                         | 4.551            | 1.369 | 0.821            | 13.483 | 48.309           | 0.384 | 10                         | 0.328              | 0.904 | 2.296  | 0.559 | 0.141 | 0.000           | 1.086 | 4.645 | 0.031 |                        |                                 |
| G1 Core <sup>4</sup>          | 0.000                | 0.807  | 29.165                         | 0.000            | 2.182 | 0.000            | 13.974 | 51.559           | 2.131 |                            | 0.000              | 0.070 | 2.000  | 0.000 | 0.136 | 0.000           | 0.680 | 3.000 | 0.114 |                        |                                 |
| G5 Core <sup>4</sup>          | 0.000                | 0.831  | 29.178                         | 0.000            | 2.279 | 0.000            | 13.426 | 51.585           | 2.700 |                            | 0.000              | 0.072 | 2.000  | 0.000 | 0.142 | 0.000           | 0.653 | 3.000 | 0.133 |                        |                                 |

| SSFM307-8D                    |                      |        |                                |                  |       |                  |        |                  |       |                            |                    |       |        |       |       |                 |       |       |       |                        |                                 |
|-------------------------------|----------------------|--------|--------------------------------|------------------|-------|------------------|--------|------------------|-------|----------------------------|--------------------|-------|--------|-------|-------|-----------------|-------|-------|-------|------------------------|---------------------------------|
|                               | Weight Percent Oxide |        |                                |                  |       |                  |        |                  |       |                            | Normalized Formula |       |        |       |       |                 |       |       |       |                        |                                 |
| Mineral                       | Na <sub>2</sub> O    | MgO    | Al <sub>2</sub> O <sub>3</sub> | K <sub>2</sub> O | CaO   | TiO <sub>2</sub> | FeO    | SiO <sub>2</sub> | MnO   | Normalization <sup>1</sup> | Na                 | Mg    | Al     | K     | Ca    | Ti <sup>2</sup> | Fe    | Si    | Mn    | Mineral Modes Used (%) | Point counted Mineral Modes (%) |
| Plagioclase                   | 8.873                | 0.000  | 23.753                         | 0.073            | 4.675 | 0.000            | 0.061  | 62.584           | 0.000 | 8                          | 0.761              | 0.000 | 1.238  | 0.004 | 0.222 | 0.000           | 0.002 | 2.768 | 0.000 | 1.503                  | 1.440                           |
| Muscovite                     | 1.997                | 0.393  | 37.078                         | 7.790            | 0.000 | 0.209            | 0.758  | 46.572           | 0.005 | 11                         | 0.284              | 0.055 | 2.837  | 0.707 | 0.000 | 0.019           | 0.044 | 3.056 | 0.000 | 44.660                 | 42.798                          |
| Quartz                        | 0.000                | 0.000  | 0.000                          | 0.000            | 0.000 | 0.000            | 0.000  | 100.000          | 0.000 | 2                          | 0.000              | 0.000 | 0.000  | 0.000 | 0.000 | 0.000           | 0.000 | 1.000 | 0.000 | 36.071                 | 34.568                          |
| Garnet                        | 0.000                | 2.057  | 21.096                         | 0.000            | 4.862 | 0.000            | 34.051 | 37.296           | 0.638 | 12                         | 0.000              | 0.247 | 2.000  | 0.000 | 0.419 | 0.000           | 2.291 | 3.000 | 0.043 | 4.025                  | 8.025                           |
| Staurolite                    | 0.001                | 1.761  | 55.115                         | 0.005            | 0.000 | 0.605            | 12.787 | 28.456           | 0.062 | 46                         | 0.000              | 0.717 | 17.753 | 0.002 | 0.000 | 0.124           | 2.923 | 7.777 | 0.012 | 1.074                  | 1.029                           |
| Chlorite                      | 0.000                | 12.587 | 22.407                         | 0.095            | 0.025 | 0.028            | 26.283 | 25.899           | 0.008 | 14                         | 0.000              | 1.985 | 2.795  | 0.013 | 0.003 | 0.002           | 2.326 | 2.741 | 0.001 | 12.668                 | 12.140                          |
| Bulk Composition <sup>3</sup> | 1.018                | 1.973  | 21.866                         | 3.503            | 0.348 | 0.106            | 5.934  | 61.203           | 0.041 | 10                         | 0.194              | 0.289 | 2.533  | 0.439 | 0.037 | 0.000           | 0.488 | 6.016 | 0.003 |                        |                                 |
| G2 Core <sup>4</sup>          | 0.000                | 0.773  | 29.178                         | 0.000            | 2.504 | 0.000            | 14.865 | 51.584           | 1.096 |                            | 0.000              | 0.067 | 2.000  | 0.000 | 0.156 | 0.000           | 0.723 | 3.000 | 0.054 |                        |                                 |

Annotations

- <sup>1</sup> Normalization factor for each mineral, based on the number of anhydrous oxygens in the chemical formula. The total bulk composition was normalized to 10 cations.
- <sup>2</sup> Ti was analyzed but set to zero in the bulk composition as the modeled system excluded Ti.
- <sup>3</sup> See text for explanation of the bulk composition calculation from the mineral compositions and modes dreported in this table.
- <sup>4</sup> Composition of garnet core used for first point of P-T path and for garnet isopleth calculations.
